# Supplementary material for: Ruthenium-complex-catalysed de-ammonification polycondensation of aromatic diamines
Source: Royal Society of Chemistry journal article supplement (doi:10.1039/d4py01264j), 2024-12-13
Supplement: d4py01264j1.pdf [file d4py01264j1.pdf]

## Supporting Information

### Ruthenium-complex-catalysed De-ammonification Polycondensation of Aromatic Diamines

Isao Yamaguchi,\* Takahiro Ooba and Kohei Imoto

#### Contents

|                                                                                                                                                                                                                                                                                               |       |
|-----------------------------------------------------------------------------------------------------------------------------------------------------------------------------------------------------------------------------------------------------------------------------------------------|-------|
| Synthesis of monomers.....                                                                                                                                                                                                                                                                    | 2     |
| <sup>1</sup> H NMR data of the polymers.....                                                                                                                                                                                                                                                  | 3     |
| <b>Fig. S1</b> <sup>1</sup> H NMR spectra of AD and AD- <i>d</i> <sub>4</sub> and <sup>2</sup> H NMR spectrum of AD- <i>d</i> <sub>4</sub> .....                                                                                                                                              | 4-6   |
| <b>Fig. S2</b> GPC curves of polymers.....                                                                                                                                                                                                                                                    | 7-12  |
| <b>Fig. S3</b> <sup>1</sup> H NMR and <sup>1</sup> H- <sup>1</sup> H COSY NMR spectra of <b>poly(AD)</b> , <b>poly(AD)-<i>d</i><sub>4</sub></b> , <b>poly(APM)-BA</b> and <b>poly(APM)-BS(Na<sup>+</sup>)</b> .....                                                                           | 12-17 |
| <b>Fig. S4</b> <sup>1</sup> H NMR spectra of <b>copoly(OTL-APM;1:1)</b> , <b>copoly(OTL-APM;1:2)</b> and <b>copoly(OTL-APM;1:3)</b> .....                                                                                                                                                     | 18    |
| <b>Fig. S5</b> UV-vis spectral changes of the cold aqueous solution of Nessler's reagent containing ammonia generated from the RuCl <sub>2</sub> (PPh <sub>3</sub> ) <sub>2</sub> -catalysed polycondensation of AD and AD- <i>d</i> <sub>4</sub> in the presence BD at 15-min intervals..... | 19    |
| <b>Fig. S6</b> UV-vis spectral changes of the NMP solution of RuCl <sub>2</sub> (PPh <sub>3</sub> ) <sub>3</sub> and BD before heating (blue curve) and at 5 min (red curve) and 15 min (green curve) after heating at 180 °C.....                                                            | 20    |
| <b>Fig. S7</b> MALDI TOF-MS spectra of the sample obtained from the reaction solution containing OTL, BD, and RuCl <sub>2</sub> (PPh <sub>3</sub> ) <sub>3</sub> , after heating for 15 min at 180 °C.....                                                                                    | 20    |
| <b>Fig. S8</b> IR spectra of <b>poly(APM)</b> , <b>poly(APM)-BI</b> and <b>poly(APM)-BS(Na<sup>+</sup>)</b> .....                                                                                                                                                                             | 21    |
| Calculation of ion conductivity and activation energy.....                                                                                                                                                                                                                                    | 22    |

|                                                                            |       |
|----------------------------------------------------------------------------|-------|
| <b>Table S1.</b> Thermodynamic data.....                                   | 22    |
| <b>Table S2.</b> Cartesian coordinates obtained from DFT calculations..... | 23-30 |

### Synthesis of monomers.

**Synthesis of APM-*d*<sub>4</sub>.** APM (0.70 g, 3.5 mmol) was stirred vigorously in a mixture of CH<sub>2</sub>Cl<sub>2</sub> (10 mL) and D<sub>2</sub>O (2 mL). The solvents were removed under vacuum, and the resulting solid was dried under vacuum to yield APM-*d*<sub>4</sub> as a white powder (0.65 g, 91%). <sup>1</sup>H NMR (400 MHz, CDCl<sub>3</sub>): δ 6.96 (d, *J* = 6.8 Hz, 4H), 6.62 (d, *J* = 6.8 Hz, 4H), 3.77 (s, 2H), 3.53 (s, 0.13H). <sup>2</sup>H NMR (400 MHz, CHCl<sub>3</sub>): δ 3.55.

OTL-*d*<sub>4</sub> and BAS-*d*<sub>4</sub> were synthesized using the same method as for the synthesis of APM-*d*<sub>4</sub>.

Data of **OTL-*d*<sub>4</sub>.** <sup>1</sup>H NMR (500 MHz, CDCl<sub>3</sub>): δ 7.22 (d, *J* = 8.0 Hz, 4H), 6.71 (d, *J* = 8.0 Hz, 4H), 3.57 (s, 0.26H). <sup>2</sup>H NMR (400 MHz, CHCl<sub>3</sub>): δ 3.61.

Data of **BAS-*d*<sub>4</sub>.** <sup>1</sup>H NMR (500 MHz, CDCl<sub>3</sub>): δ 7.67 (d, *J* = 6.0 Hz, 4H), 6.64 (d, *J* = 7.5 Hz, 4H), 4.04 (s, 0.20H). <sup>2</sup>H NMR (400 MHz, CHCl<sub>3</sub>): δ 4.11.

### **<sup>1</sup>H NMR data of the polymers.**

<sup>1</sup>H NMR data of **poly(OTL)**.  $\delta$  6.68-7.32 (8H), 6.24 (0.22H), 5.03 (0.97H), 2.12 (6H).

<sup>1</sup>H NMR data of **poly(OTL-*d*<sub>4</sub>)**.  $\delta$  6.66-7.29 (8H), 6.21 (0.20H), 5.02 (0.78H), 2.09 (6H).

<sup>1</sup>H NMR data of **poly(MTL)**.  $\delta$  6.43-7.37 (8H), 6.18 (0.17H), 4.02 (0.50H), 1.89 (6H).

<sup>1</sup>H NMR data of **poly(TMB)**.  $\delta$  6.74-7.15 (4H), 6.24 (0.15H), 4.69 (0.58H), 2.13 (12H).

<sup>1</sup>H NMR data of **poly(APM)**.  $\delta$  6.43-7.27 (8H), 6.23 (0.19H), 4.84 (0.55H), 3.74 (2H).

<sup>1</sup>H NMR data of **poly(APM)'**.  $\delta$  6.45-7.23 (8H), 4.82 (0.60H), 3.78 (2H).

<sup>1</sup>H NMR data of **poly(APM-*d*<sub>4</sub>)**.  $\delta$  6.46-7.43 (8H), 6.23 (0.19H), 4.86 (0.55H), 3.76 (2H).

<sup>1</sup>H NMR data of **poly(AMM)**.  $\delta$  6.49-7.07 (8H), 6.17 (0.36H), 4.62 (0.61H), 3.69 (1.7H), 1.98 (6.0H).

<sup>1</sup>H NMR data of **poly(APE)**.  $\delta$  6.60-7.43 (8H), 6.23 (0.23H), 4.98 (0.47H).

<sup>1</sup>H NMR data of **poly(BAS)**.  $\delta$  6.57-7.43 (8H), 6.30 (0.28H), 5.98-6.17 (1.1H).

<sup>1</sup>H NMR data of **poly(BAS)'**.  $\delta$  6.57-7.56 (8H), 6.18 (1H).

<sup>1</sup>H NMR data of **poly(BAS-*d*<sub>4</sub>)**.  $\delta$  6.57-7.43 (8H), 6.30 (0.26H), 5.97-6.12 (1H).

<sup>1</sup>H NMR data of **poly(BAO)**.  $\delta$  6.69-8.12 (8H), 6.34 (0.17H), 5.896 (0.55H).

<sup>1</sup>H NMR data of **poly(DAB)**.  $\delta$  6.59-7.51 (8H), 6.33 (0.31H), 5.87-6.16 (0.62H).

<sup>1</sup>H NMR data of **poly(APM)-BA**.  $\delta$  6.54-7.77 (8H), 4.43-4.51 (2.95H), 2.45 (11H including water), 2.45 (3H), 1.61 (4H).

<sup>1</sup>H NMR data of **poly(APM)-BS(Na<sup>+</sup>)**.  $\delta$  8.64 (0.64H), 7.03-7.26 (8H), 6.03 (0.81H), 3.75 (0.76H), 2.95 (1.1H), 1.25 (4H), 0.84 (3H).

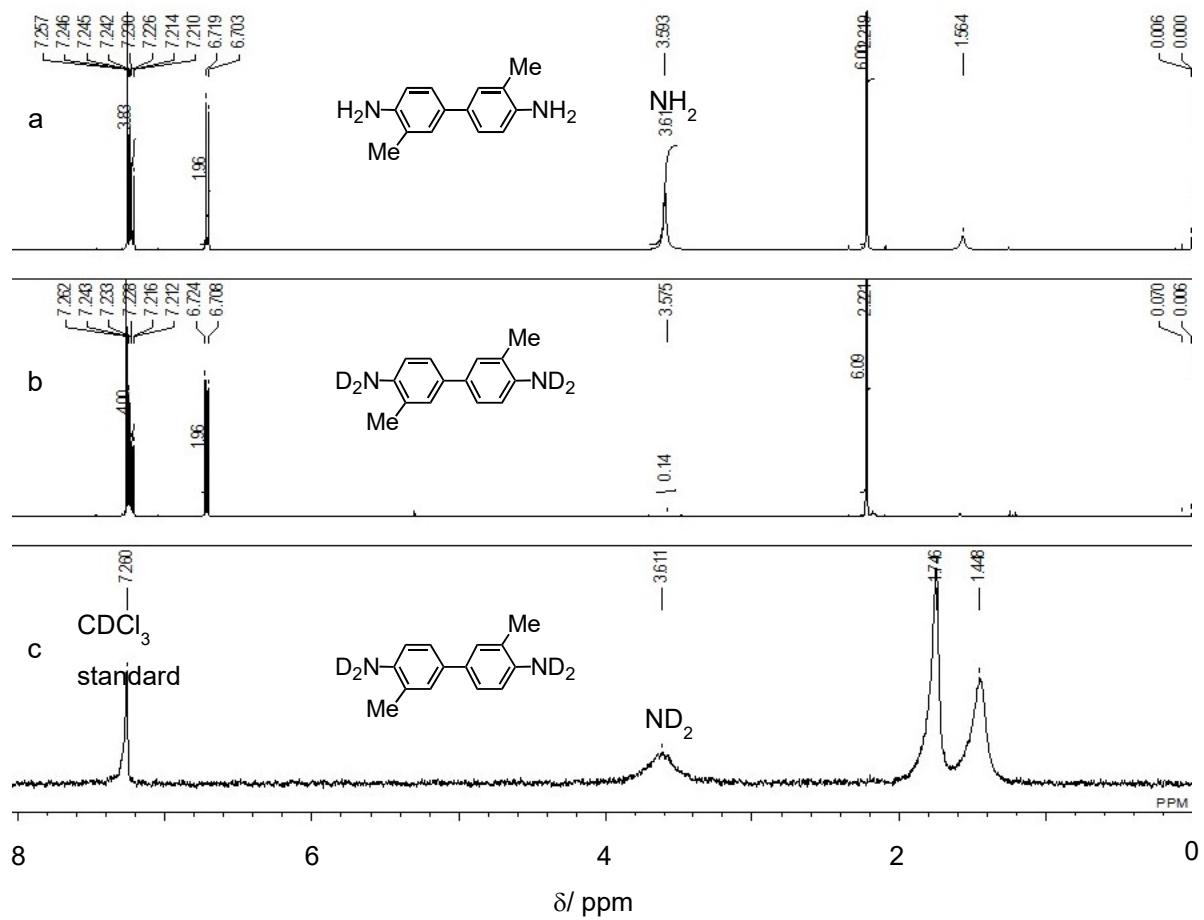

**Figure S1a.**  $^1\text{H}$  NMR spectra of (a) OTL and (b) OTL- $d_4$  in  $\text{CDCl}_3$  and  $^2\text{H}$  NMR spectrum of OTL- $d_4$  in  $\text{CHCl}_3$ .

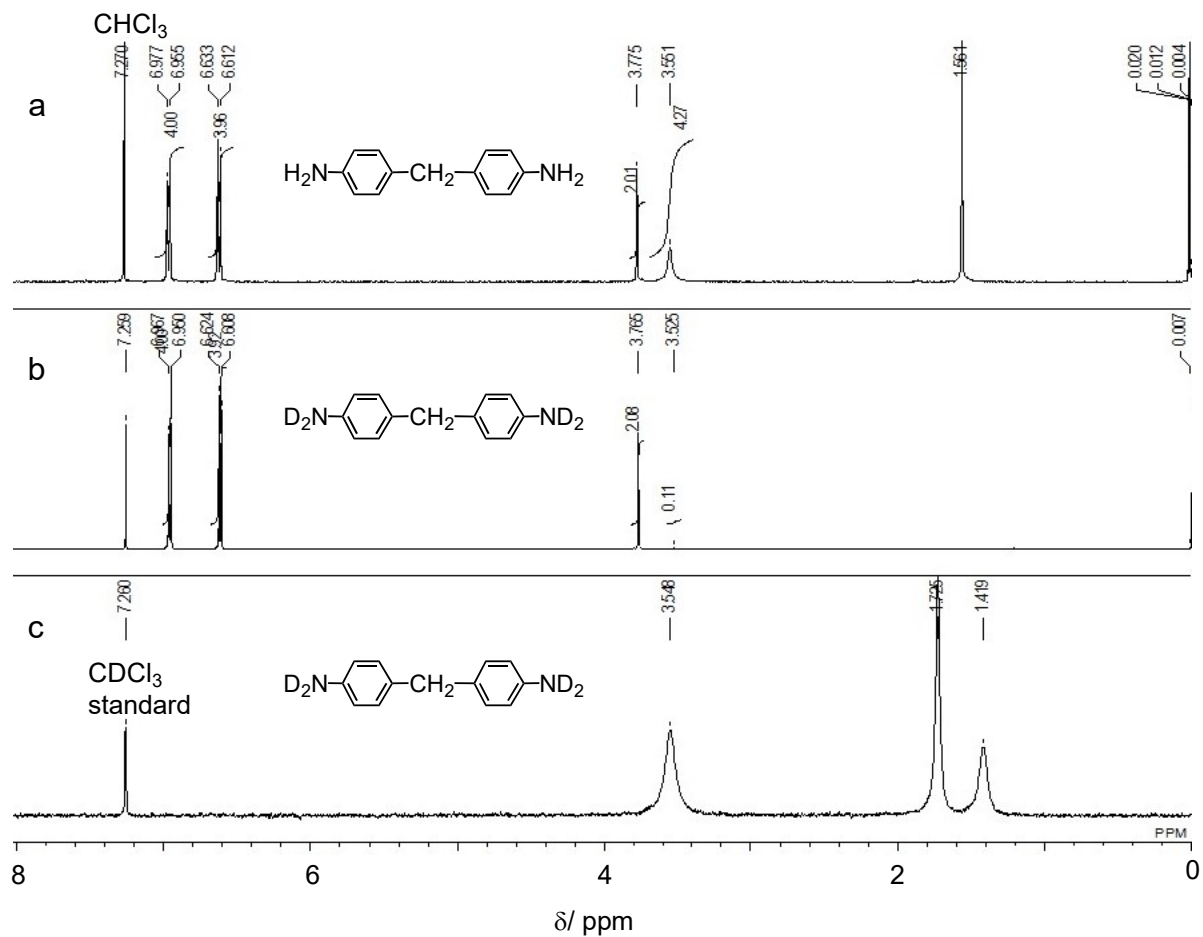

**Figure S1b.** <sup>1</sup>H NMR spectra of (a) APM and (b) APM-*d*<sub>4</sub> in CDCl<sub>3</sub> and <sup>2</sup>H NMR spectrum of APM-*d*<sub>4</sub> in CHCl<sub>3</sub>.

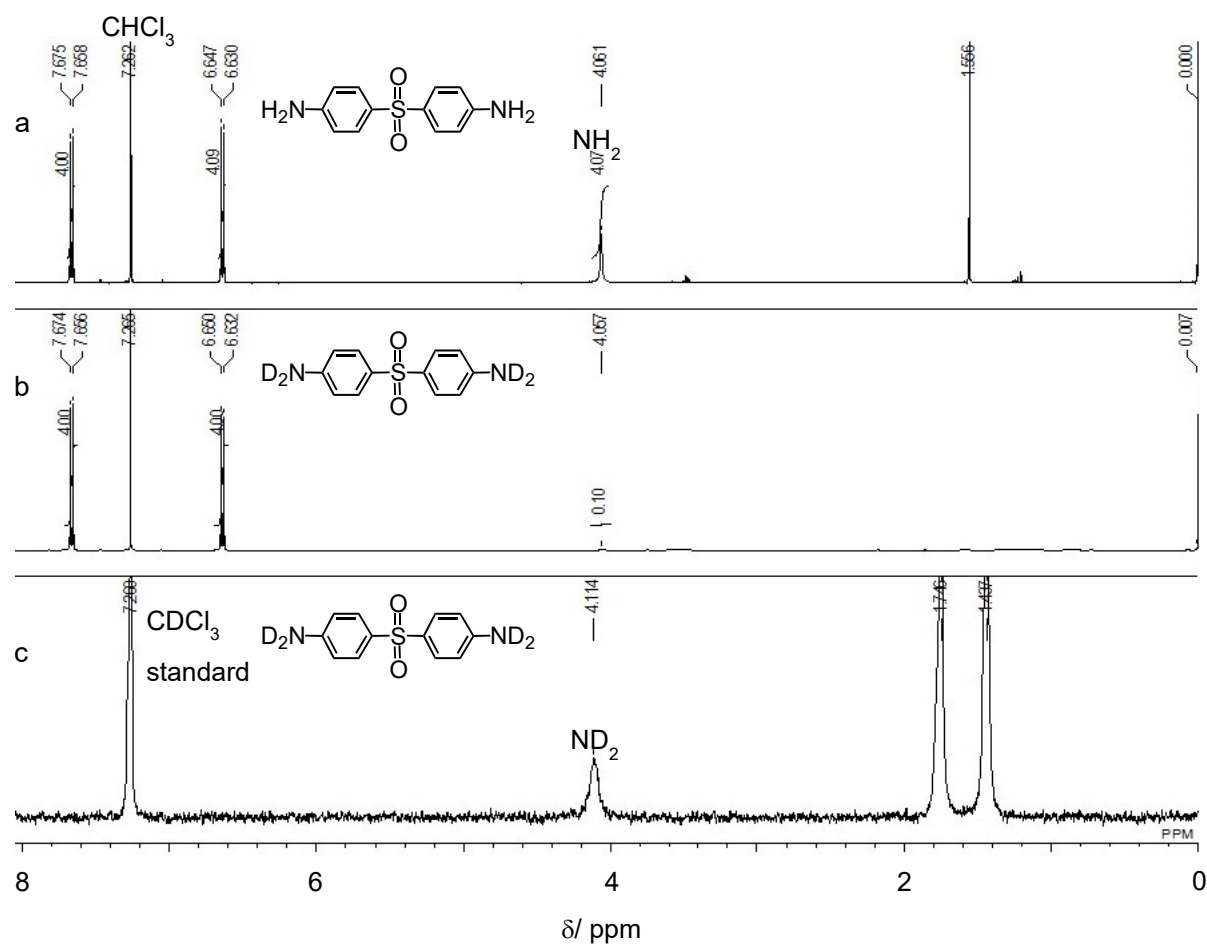

**Figure S1c.**  $^1\text{H}$  NMR spectra of (a) BAS and (b) BAS- $d_4$  in  $\text{CDCl}_3$  and  $^2\text{H}$  NMR spectrum of BAS- $d_4$  in  $\text{CHCl}_3$ .

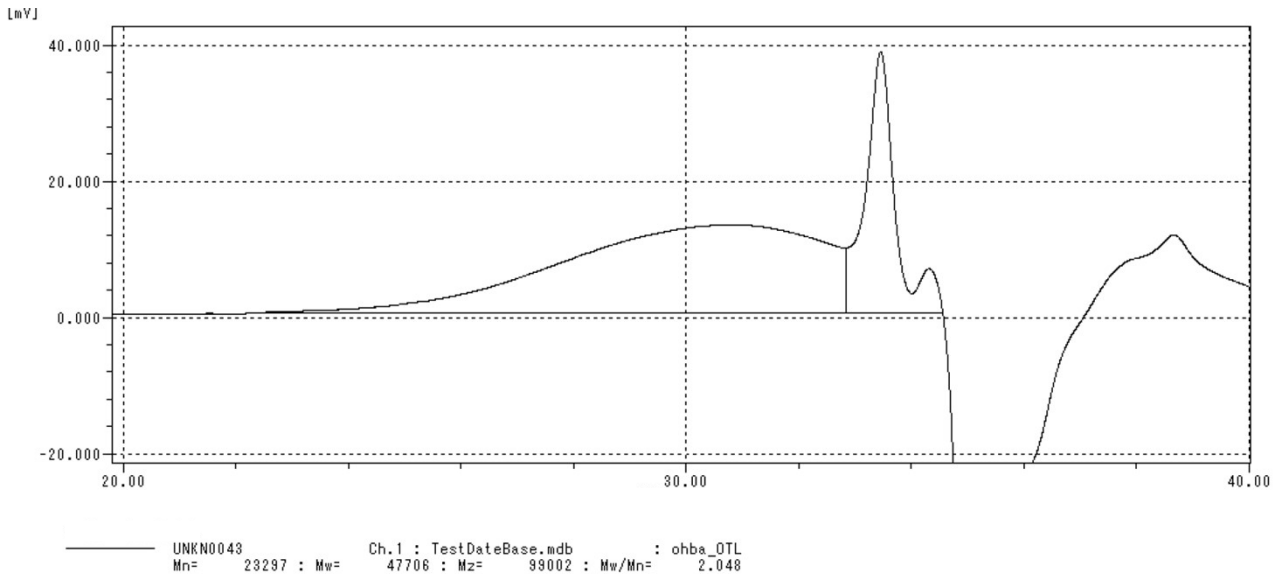

**Figure S2a.** GPC curve of poly(OTL).

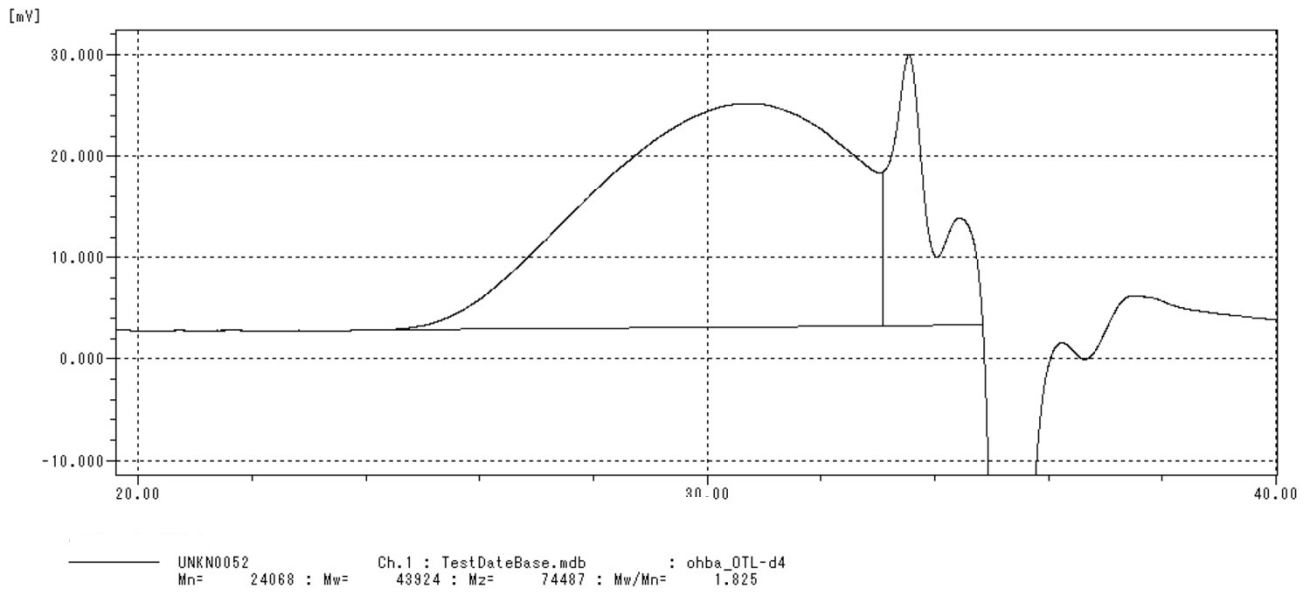

**Figure S2b.** GPC curve of poly(OTL- $d_4$ ).

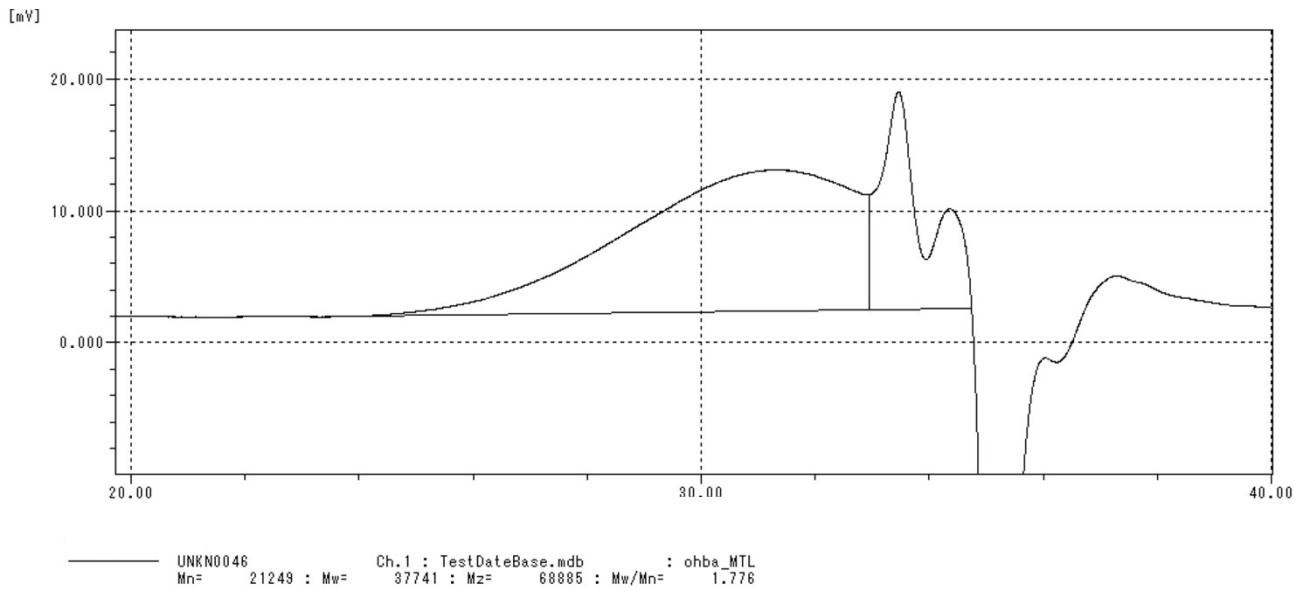

**Figure S2c. GPC curve of poly(MTL).**

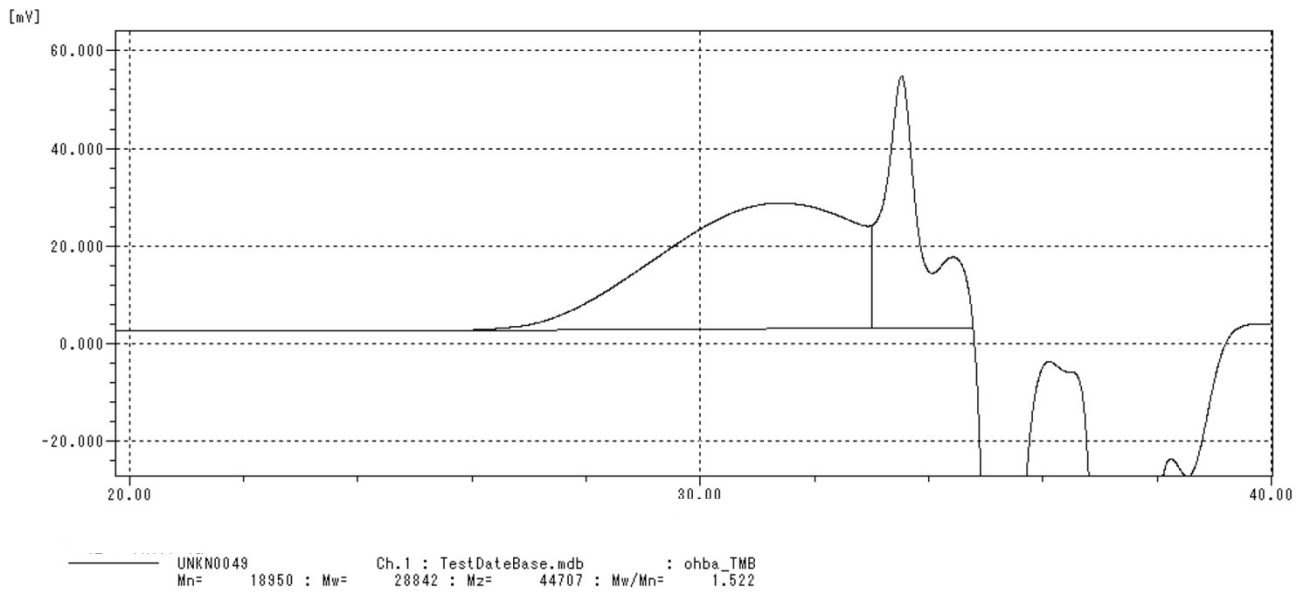

**Figure S2d. GPC curve of poly(TMB).**



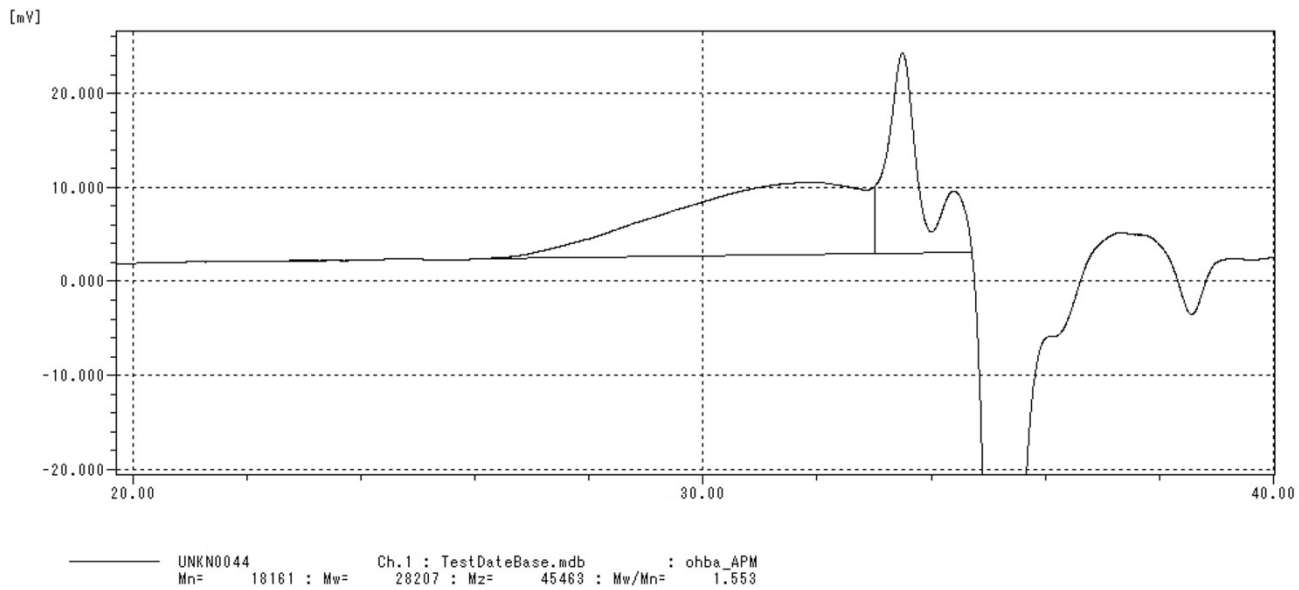

**Figure S2e.** GPC curve of poly(APM).

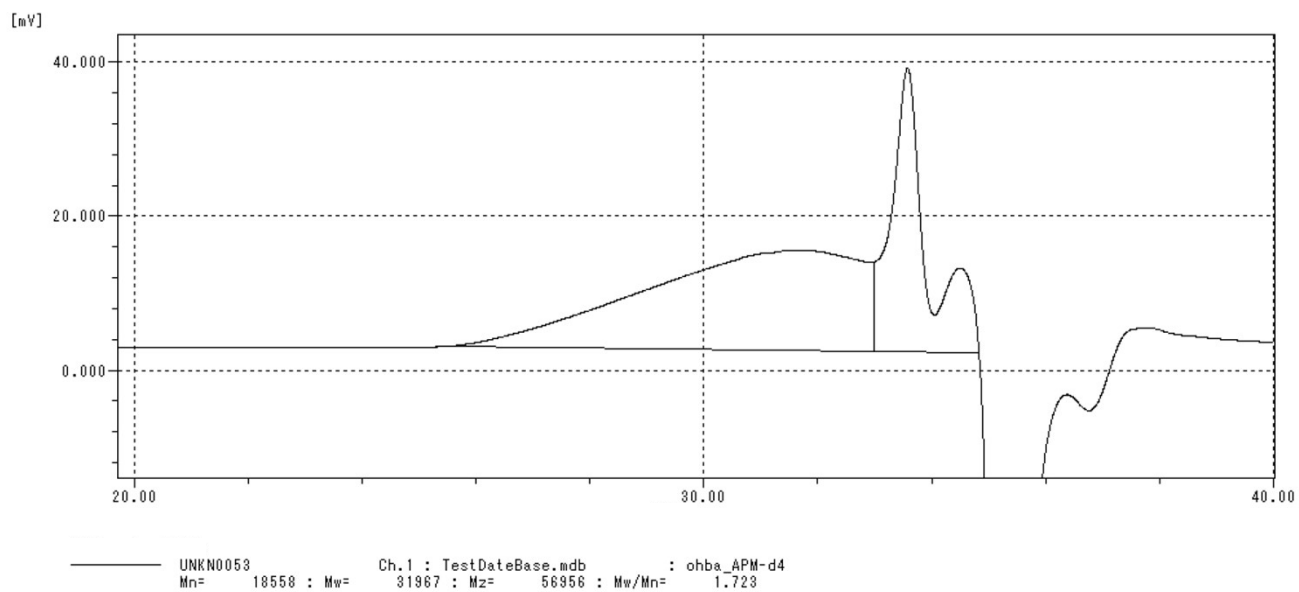

**Figure S2f.** GPC curve of poly(APM- $d_4$ ).

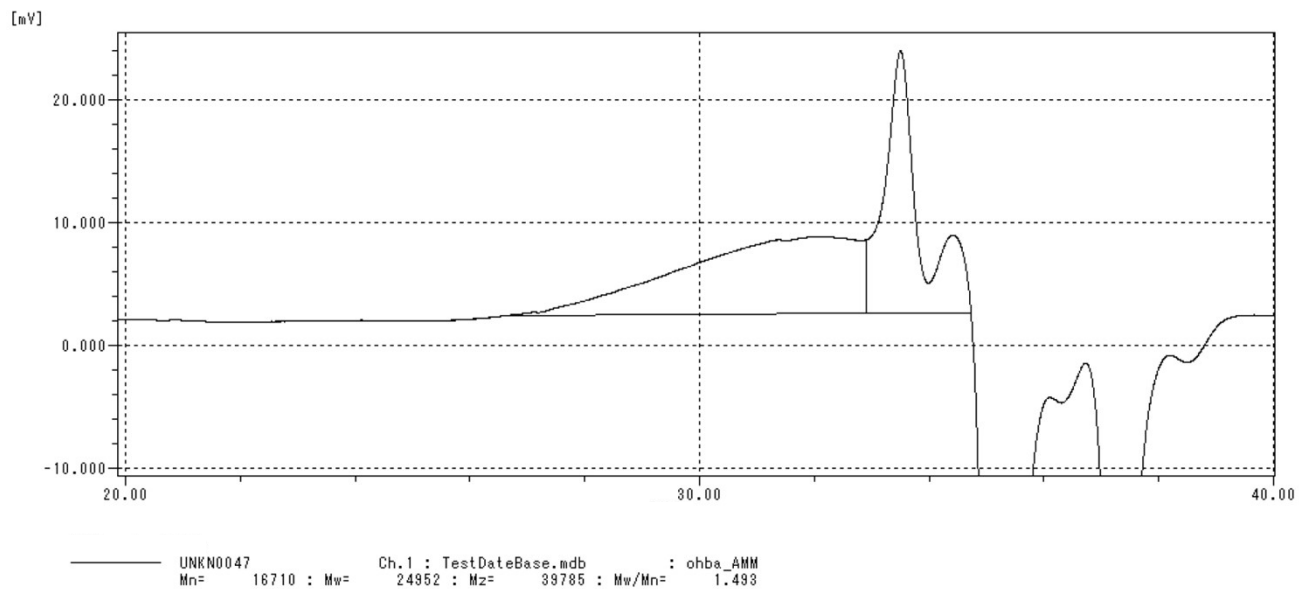

**Figure S2g.** GPC curve of poly(AMM).

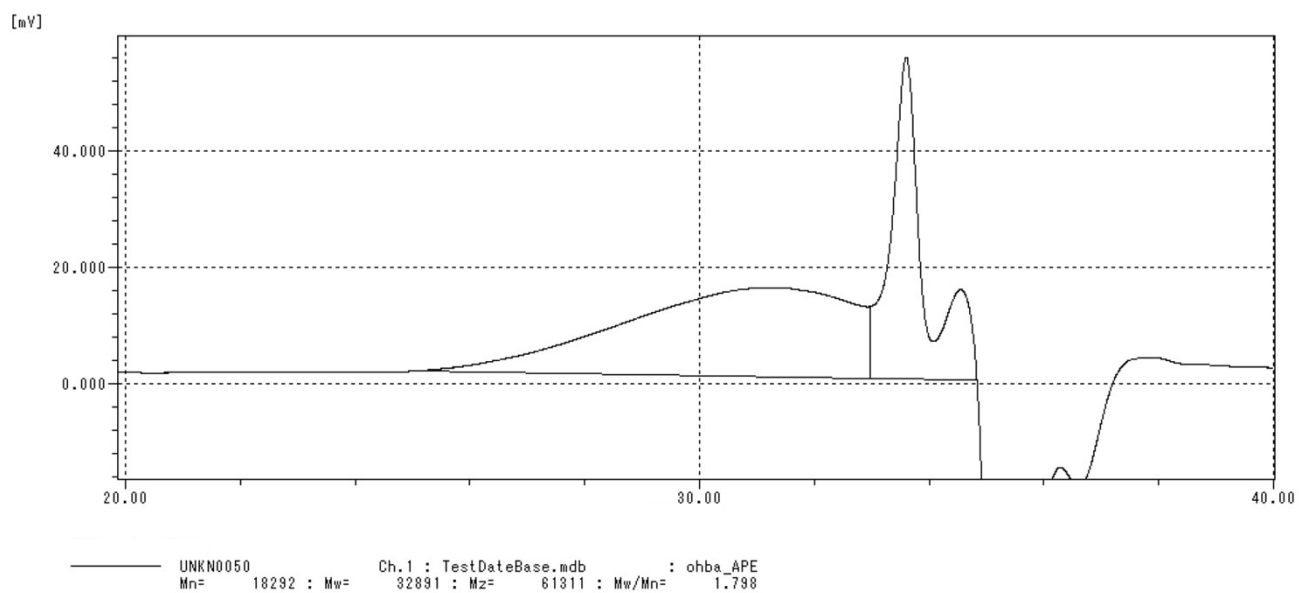

**Figure S2h.** GPC curve of poly(APE).

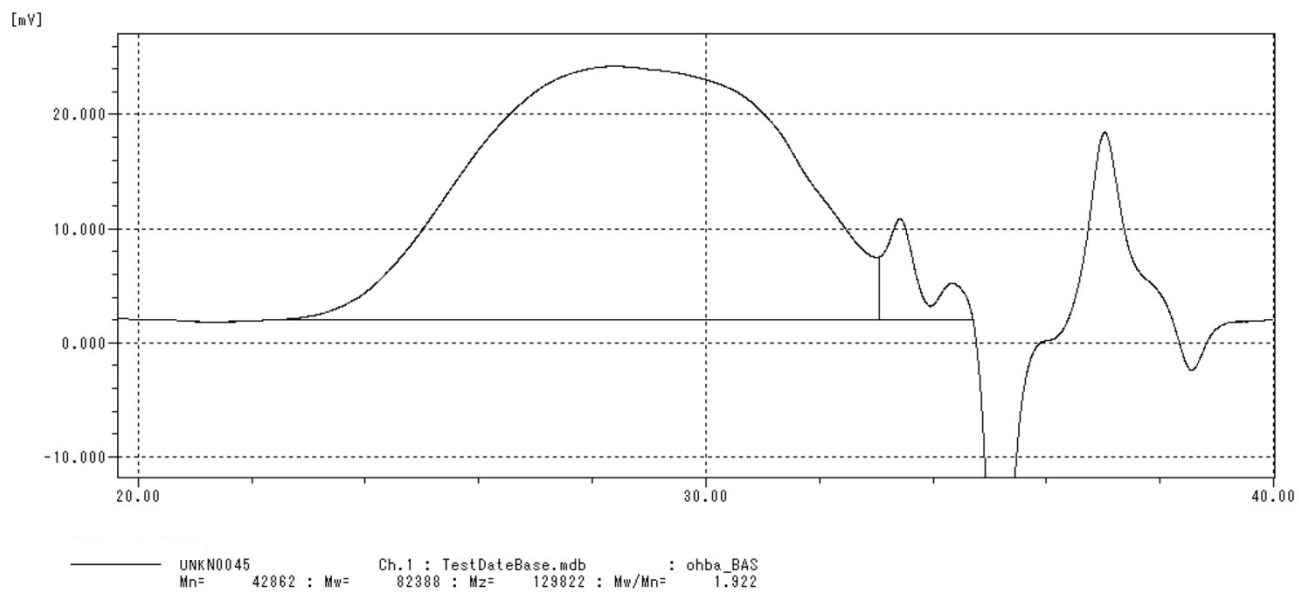

**Figure S2i.** GPC curve of poly(BAS).

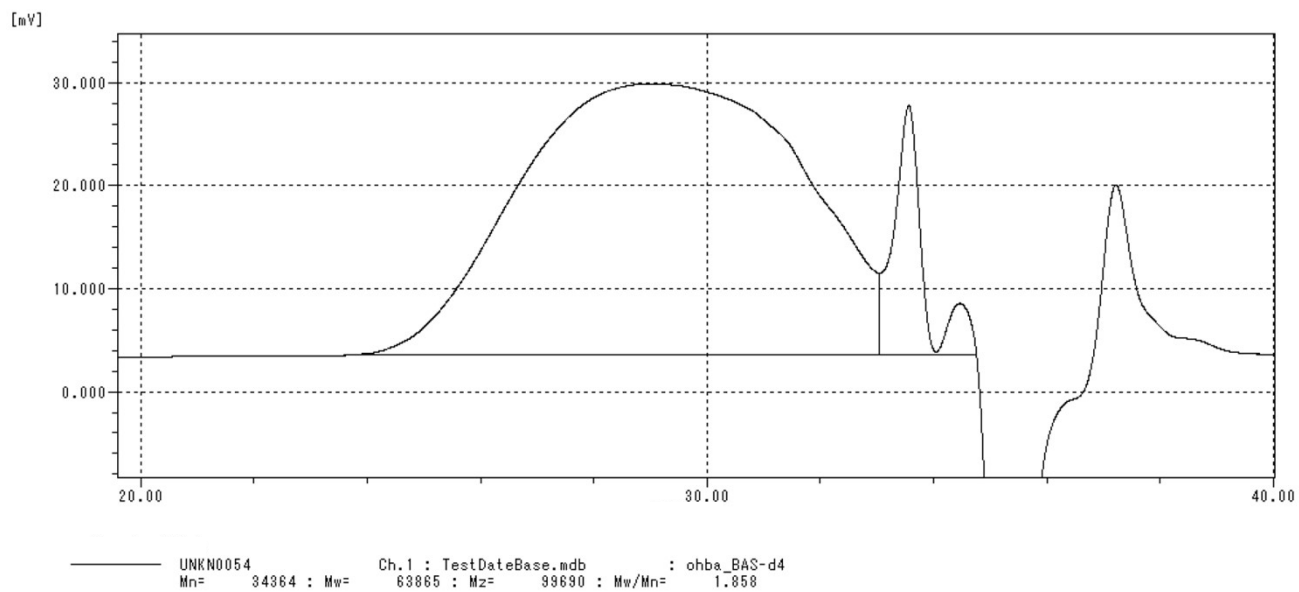

**Figure S2j.** GPC curve of poly(BAS- $d_4$ ).

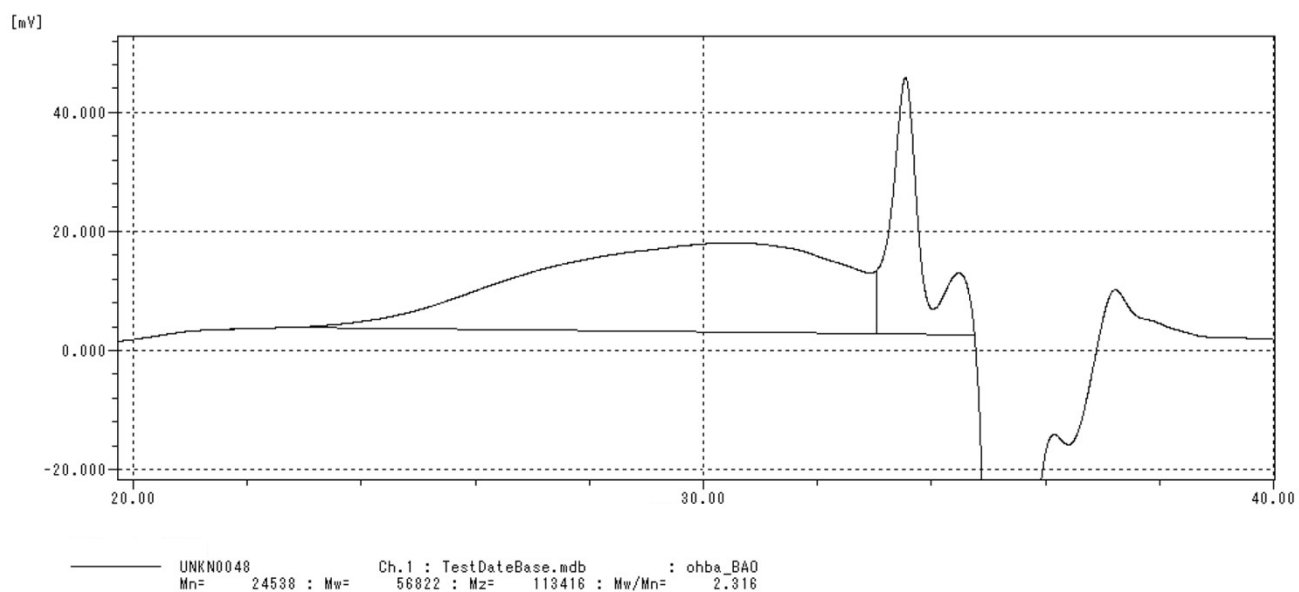

**Figure S2k. GPC curve of poly(BAO).**

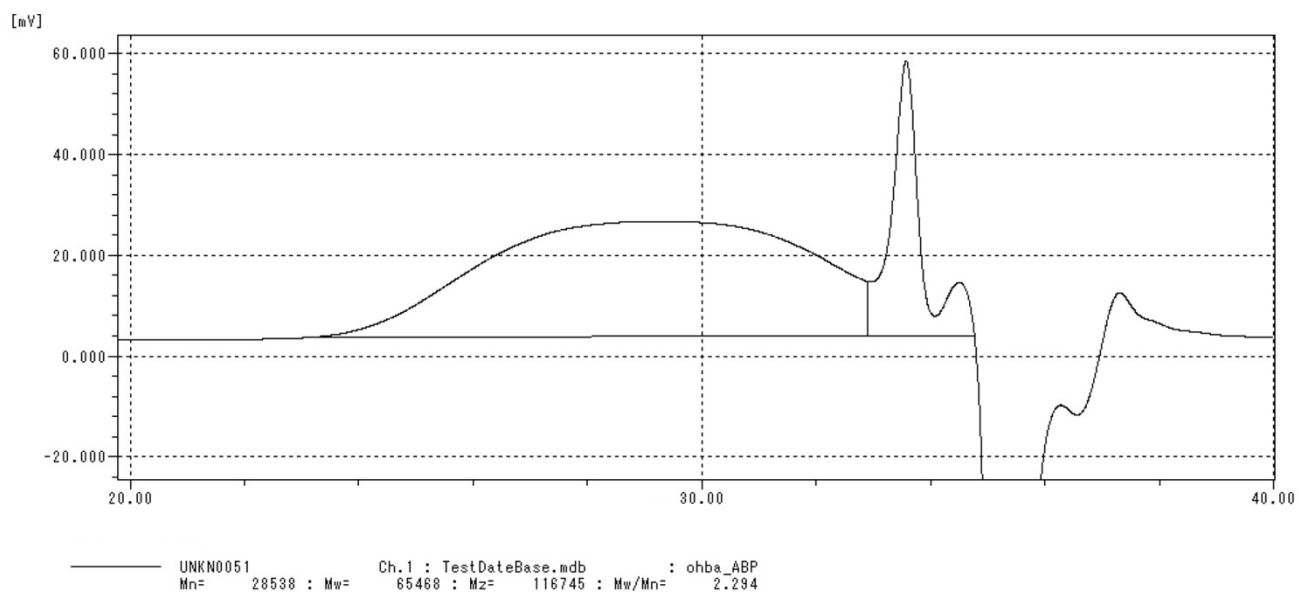

**Figure S2l. GPC curve of poly(DAB).**

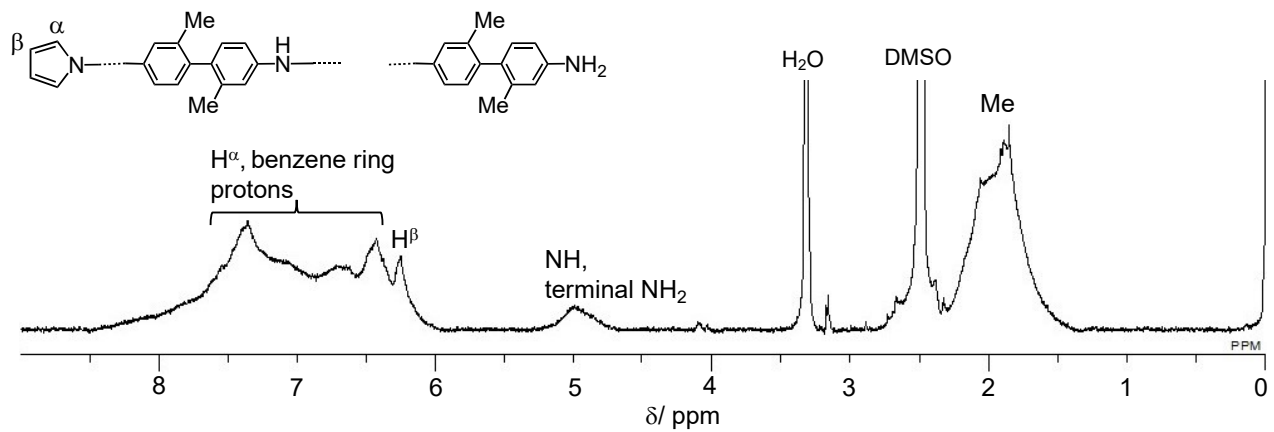

Figure S3a.  $^1\text{H}$  NMR spectrum of poly(MTL) in  $\text{DMSO-}d_6$ .

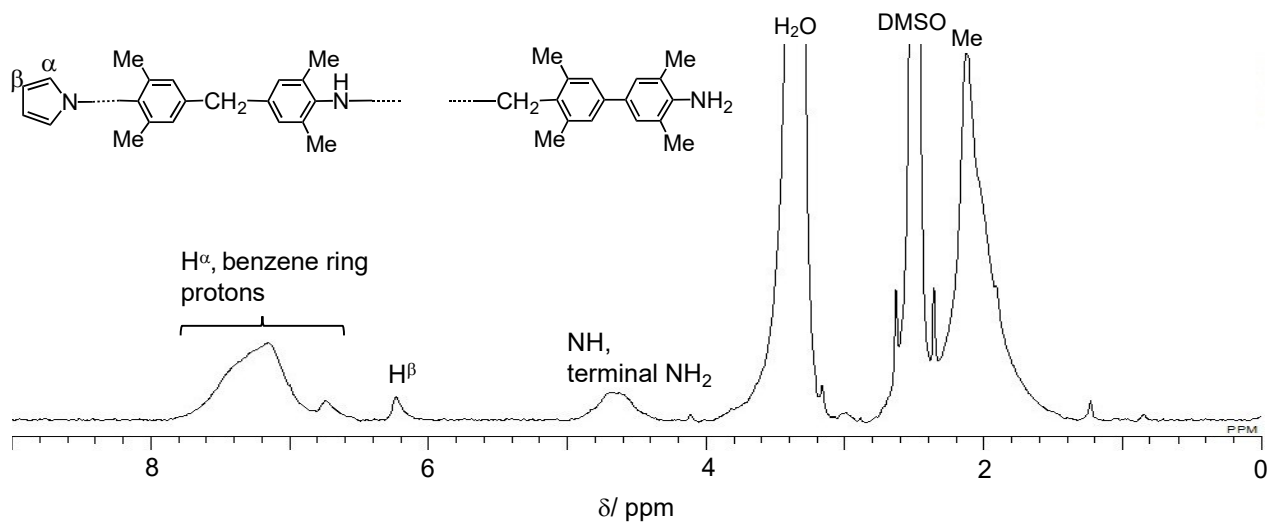

Figure S3b.  $^1\text{H}$  NMR spectrum of poly(TMB) in  $\text{DMSO-}d_6$ .

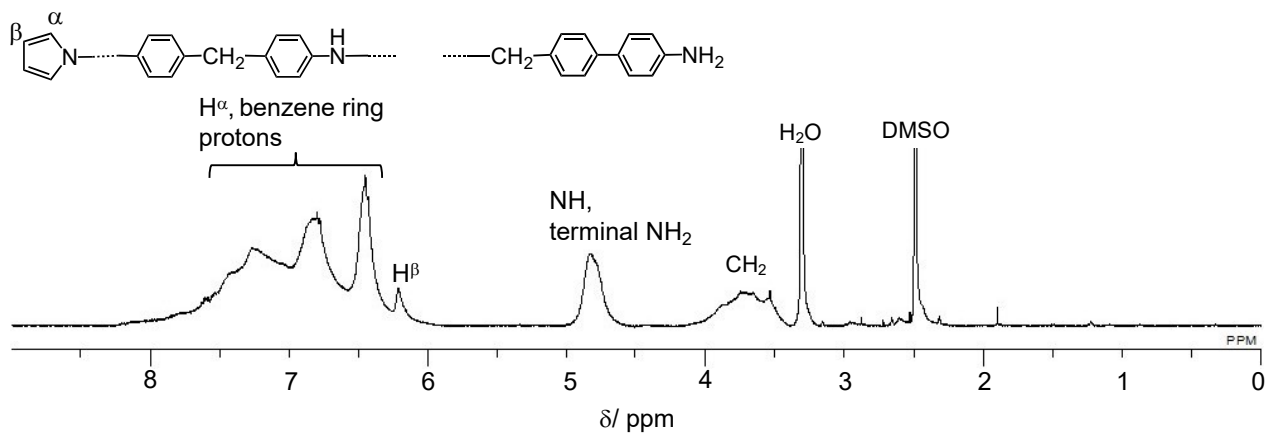

Figure S3c.  $^1\text{H}$  NMR spectrum of poly(APM) in  $\text{DMSO-}d_6$ .

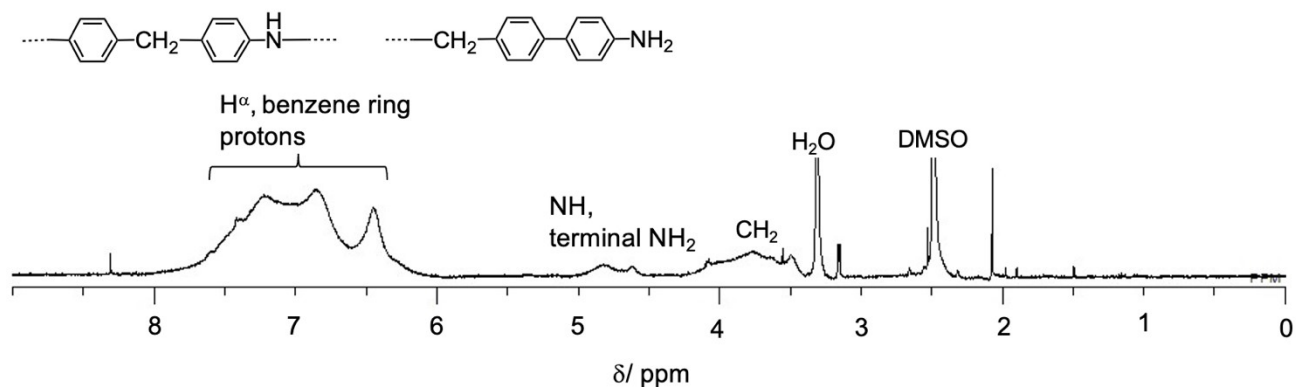

**Figure S3d.**  $^1\text{H}$  NMR spectrum of poly(APM)' in  $\text{DMSO-}d_6$ .

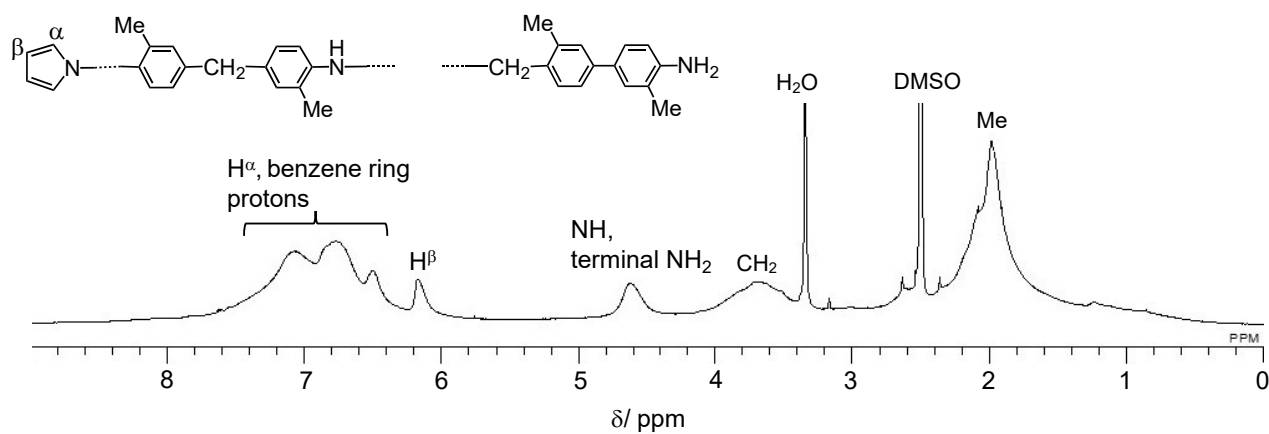

**Figure S3e.**  $^1\text{H}$  NMR spectrum of poly(AMM) in  $\text{DMSO-}d_6$ .

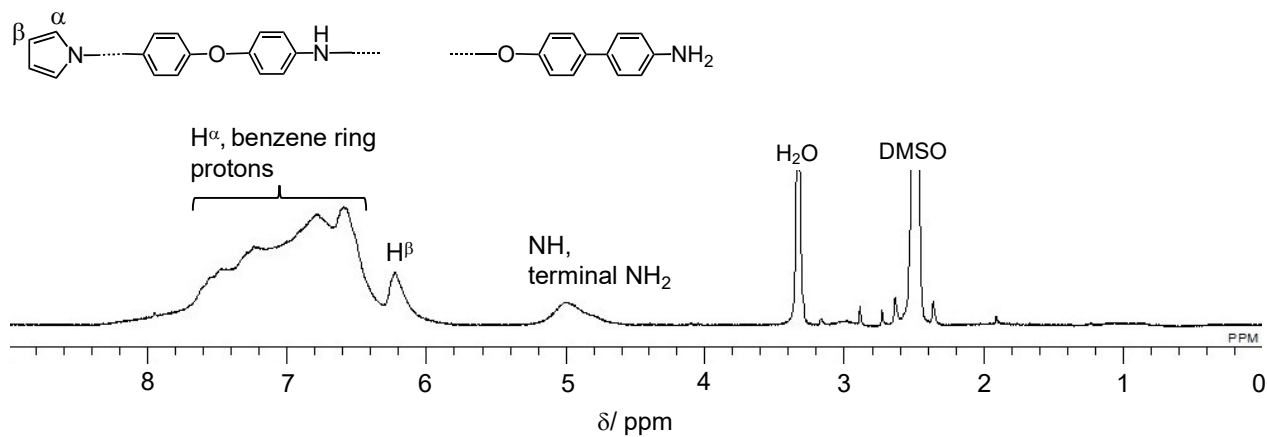

**Figure S3f.**  $^1\text{H}$  NMR spectrum of poly(APE) in  $\text{DMSO-}d_6$ .

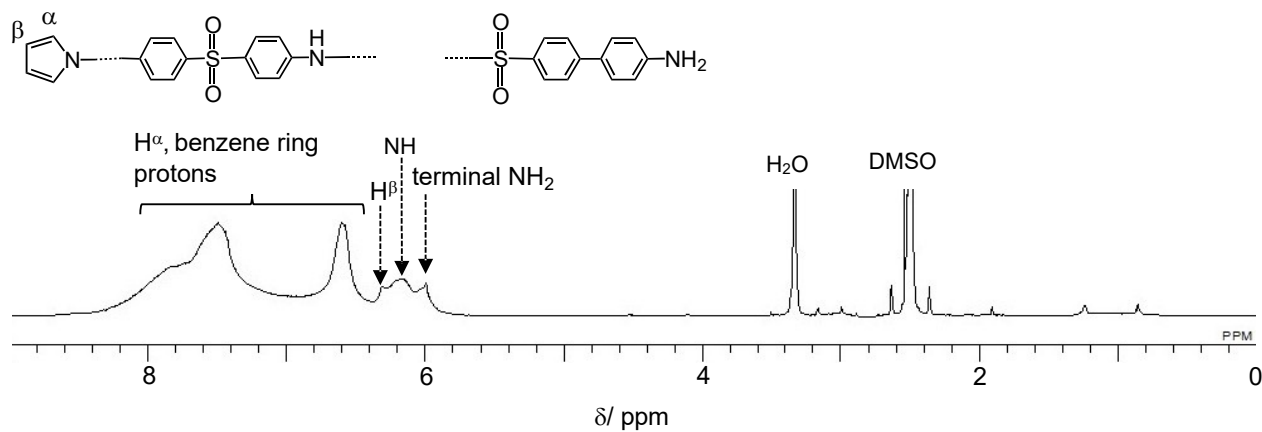

**Figure S3g.**  $^1\text{H}$  NMR spectrum of poly(BAS) in  $\text{DMSO-}d_6$ .

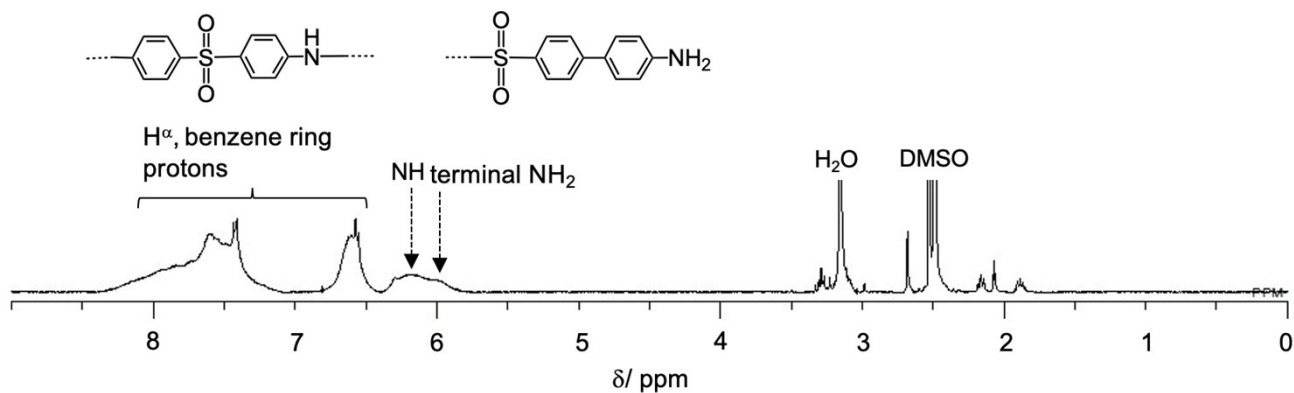

**Figure S3h.**  $^1\text{H}$  NMR spectrum of **poly(BAS)'** in  $\text{DMSO-}d_6$ .

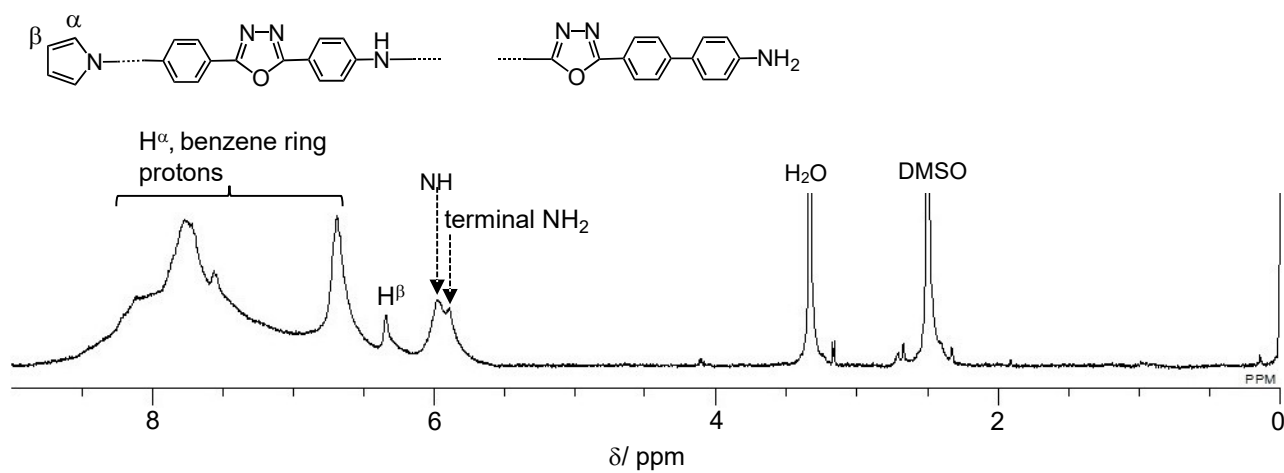

**Figure S3i.**  $^1\text{H}$  NMR spectrum of **poly(BAO)** in  $\text{DMSO-}d_6$ .

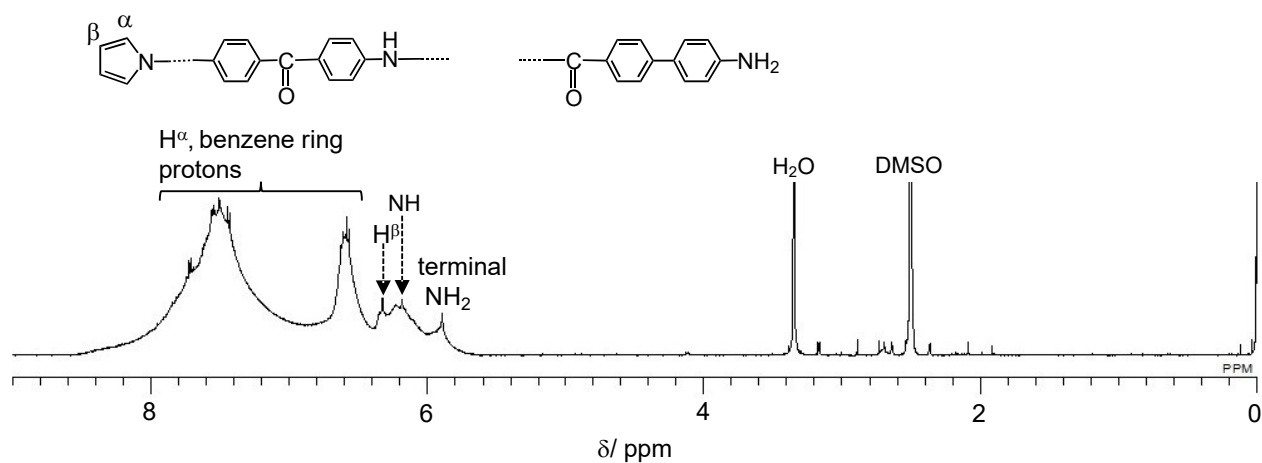

**Figure S3j.**  $^1\text{H}$  NMR spectrum of **poly(DAB)** in  $\text{DMSO-}d_6$ .

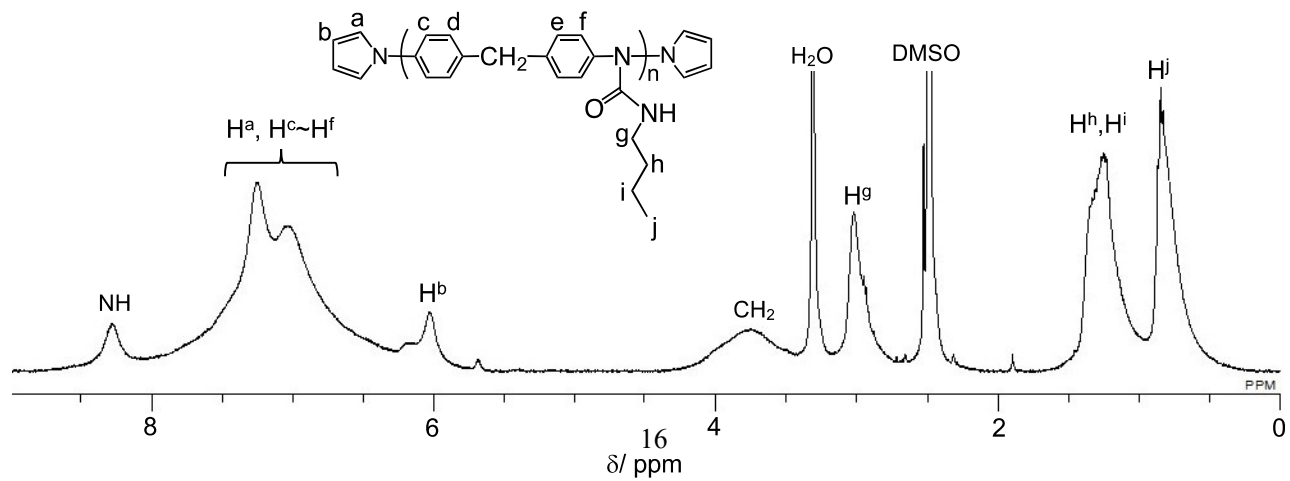



**Figure S3k.**  $^1\text{H}$  NMR spectrum of **poly(APM)-BA** in  $\text{DMSO-}d_6$ .

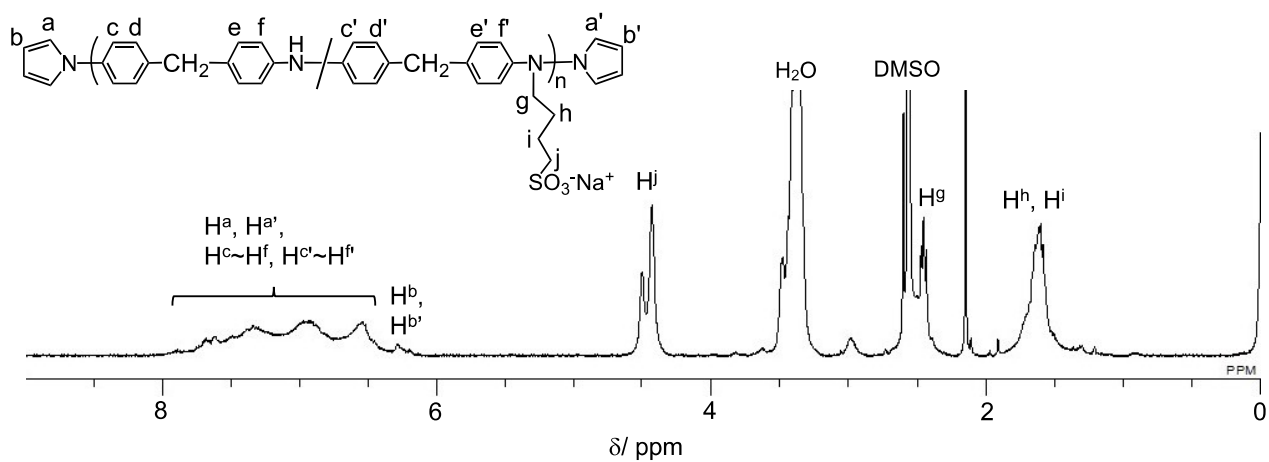

**Figure S3l.**  $^1\text{H}$  NMR spectrum of **poly(APM)-BS( $\text{Na}^+$ )** in  $\text{DMSO-}d_6$ .

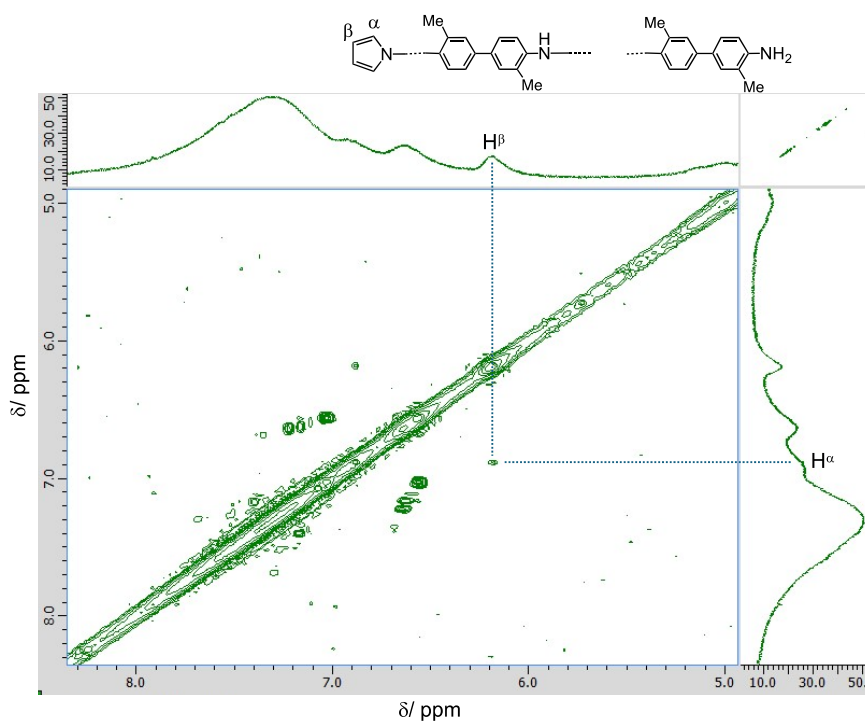

**Figure S3m.**  $^1\text{H}$ - $^1\text{H}$  COSY NMR spectrum of **poly(OTL)** in  $\text{DMSO-}d_6$ .

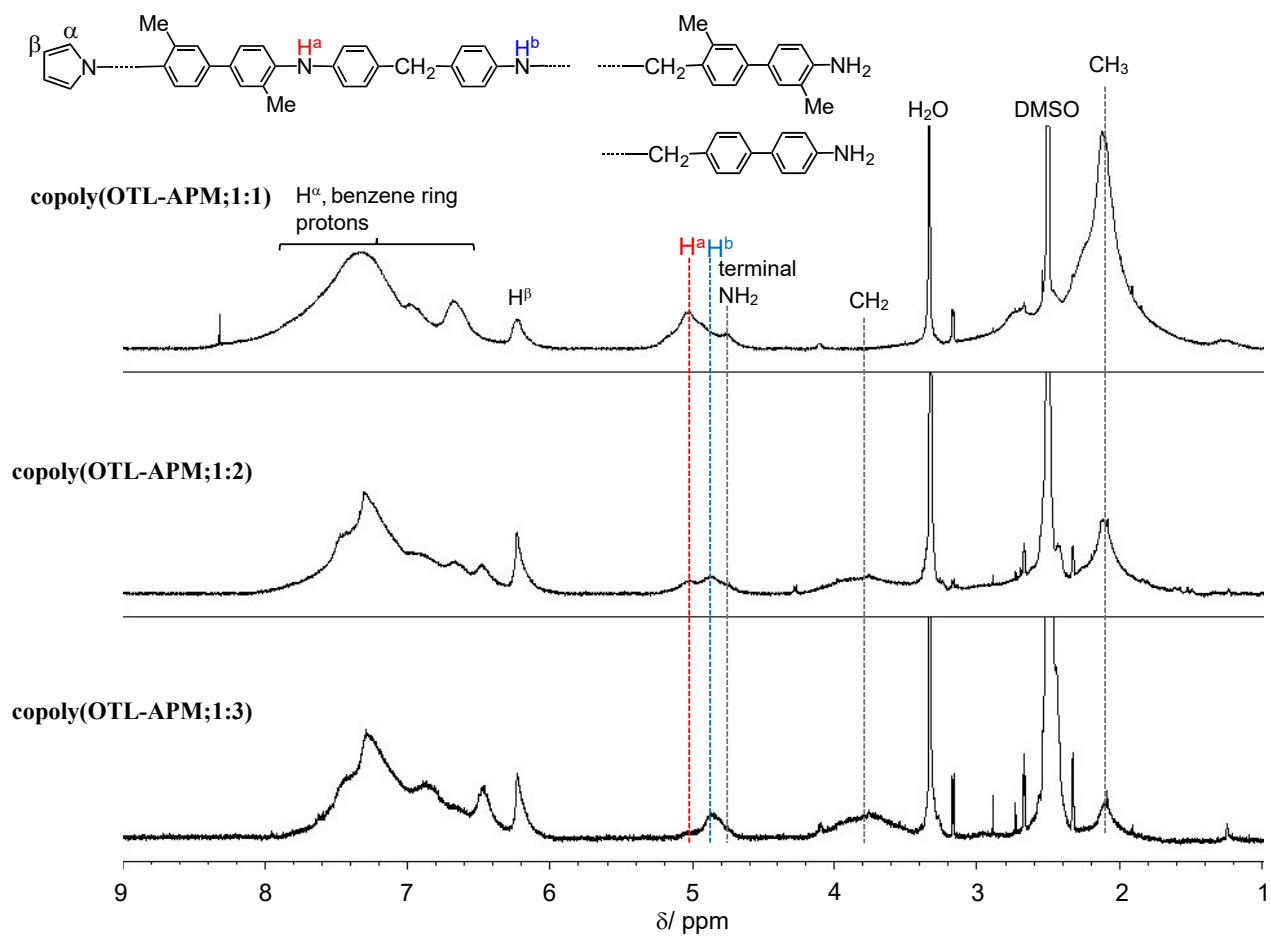

**Figure S4.**  $^1\text{H}$  NMR spectra of **copoly(OTL-APM;1:1)**, **copoly(OTL-APM;1:2)** and **copoly(OTL-APM;1:3)** in  $\text{DMSO-}d_6$ .

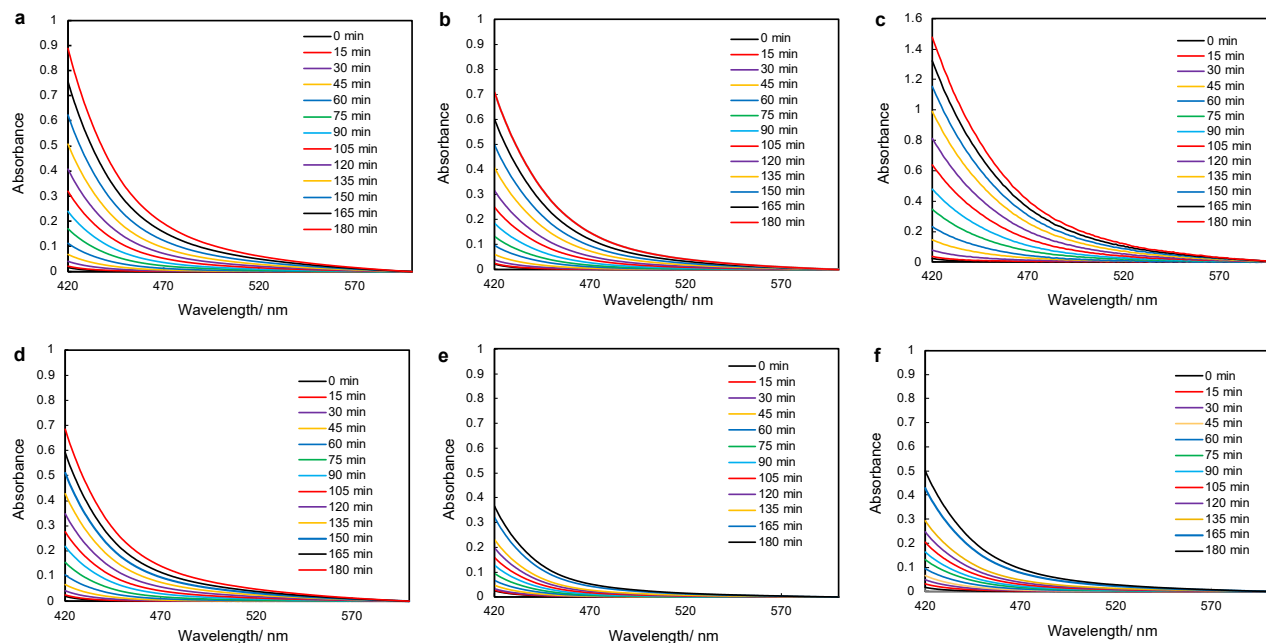

**Figure S5.** UV-vis spectral changes of the cold aqueous solution of Nessler's reagent containing ammonia generated from the RuCl<sub>2</sub>(PPh<sub>3</sub>)<sub>2</sub>-catalyzed polycondensation of (a) OTL, (b) APM, (c) BSA, (d) OTL-*d*<sub>4</sub>, (e) APM-*d*<sub>4</sub> and (e) BAS-*d*<sub>4</sub> in the presence BD were monitored at 15-minute intervals.

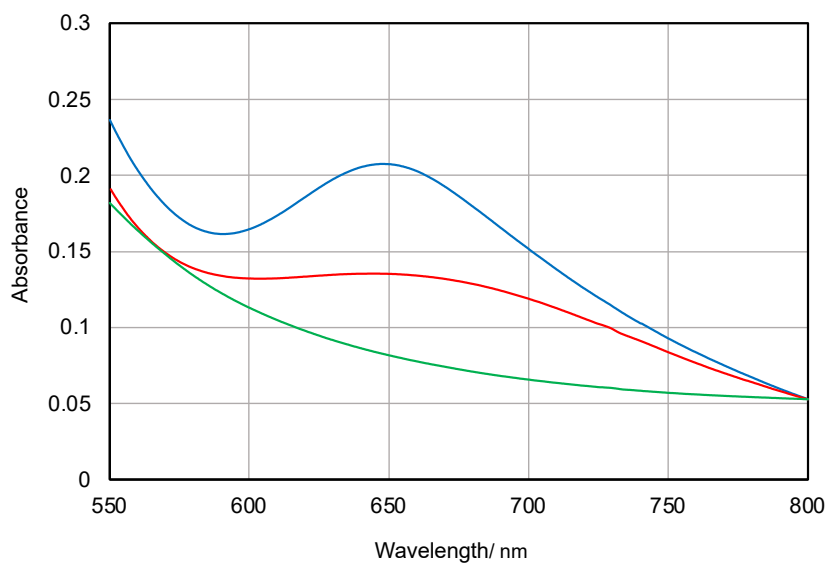

**Figure S6.** UV-vis spectra of the NMP solution of  $\text{RuCl}_2(\text{PPh}_3)_3$  and BD measured before heating (blue curve) and 5 min (red curve), and 30 min (green curve) after heating at  $180\text{ }^\circ\text{C}$ .

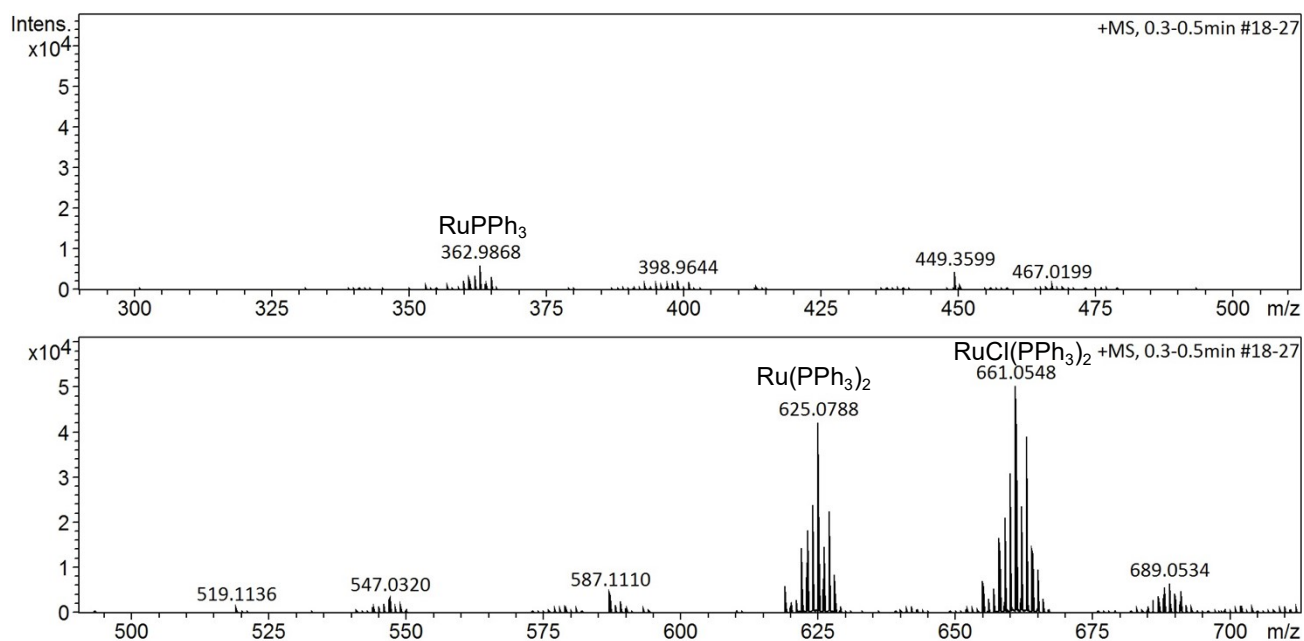

**Figure S7.** MALDI TOF-MS spectra of the sample obtained from the reaction solution containing OTL, BD, and  $\text{RuCl}_2(\text{PPh}_3)_3$ , after heating for 15 min at  $180\text{ }^\circ\text{C}$ .

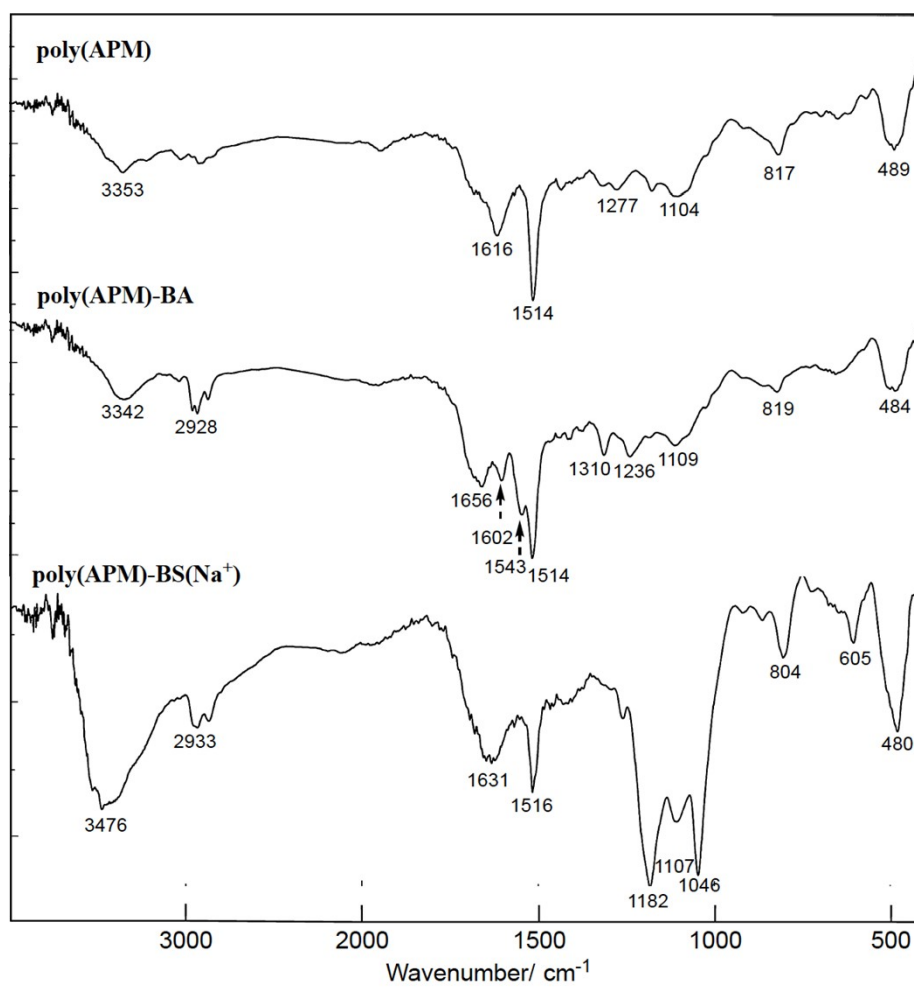

**Figure S8.** IR spectra of poly(APM), poly(APM)-BA and poly(APM)-BS(Na<sup>+</sup>).

### Calculation of ion conductivity and activation energy.

The ion conductivity ( $\sigma$ ) of **poly(APM)-BS(Na<sup>+</sup>)** was calculated using the following equation:

$$\sigma = d / (R \cdot S)$$

where  $d$  is the thickness,  $R$  is the bulk resistance obtained from the Nyquist plot of complex impedance measurements, and  $S$  is the contact area.

The activation energy for sodium ion conduction ( $E_a$ ) was calculated using a Arrhenius expression:

$$\sigma = \sigma_0 e^{-E_a/RT}$$

$\sigma_0$  is a constant,  $R$  is the gas constant, and  $T$  is the temperature.

**Table S1.** Thermodynamic data.

| Structure                          | ZPE     | TCH     | TCG     | E           | H           | G           |
|------------------------------------|---------|---------|---------|-------------|-------------|-------------|
| Ru(PMe <sub>3</sub> ) <sub>2</sub> | 144.283 | 165.720 | 94.596  | -637508.217 | -637342.497 | -637413.621 |
| Benzidine                          | 135.587 | 153.125 | 93.246  | -360060.923 | -359907.798 | -359967.677 |
| TS1                                | 278.826 | 318.264 | 207.875 | -997575.443 | -997257.179 | -997367.568 |
| TS2                                | 276.517 | 313.337 | 211.238 | -997583.480 | -997270.143 | -997372.242 |
| 3                                  | 278.861 | 319.187 | 206.442 | -997604.799 | -997285.612 | -997398.357 |
| 4                                  | 277.987 | 316.742 | 207.841 | -997615.388 | -997298.646 | -997407.547 |

ZPE: Zero-Point Energy Corrections, TCH: Thermal Corrections to Enthalpies, TCG: Thermal Corrections to Gibbs Free Energy, E: Electronic Energies, H: Enthalpies (H), and G: Gibbs Free Energies in NMP at 453 K. All Energies Are Given in Hartree.

**Table S2a.** Cartesian coordinates of Ru(PMe<sub>3</sub>)<sub>2</sub>.

|    |      |               |               |               |
|----|------|---------------|---------------|---------------|
| Ru | 44.0 | -1.0495584677 | -0.2051424884 | 0.2573052399  |
| P  | 15.0 | 0.9222115018  | -1.0758435480 | 0.4552695551  |
| P  | 15.0 | -0.4288012416 | 1.7009331972  | -0.5643108823 |
| C  | 6.0  | 0.8137929826  | -2.9114308560 | 0.7360246872  |
| C  | 6.0  | 2.1872552311  | -1.0298311169 | -0.9003802683 |
| C  | 6.0  | 1.9918396795  | -0.5902897496 | 1.8944512299  |
| C  | 6.0  | -1.8348729154 | 2.9180201319  | -0.5441375016 |
| C  | 6.0  | 0.9103431254  | 2.7301496993  | 0.2034196146  |
| C  | 6.0  | 0.0685752573  | 1.8114485300  | -2.3510804343 |
| H  | 1.0  | 0.1639857636  | -3.1189989494 | 1.5933029418  |
| H  | 1.0  | 0.3819788526  | -3.3924006680 | -0.1471095355 |
| H  | 1.0  | 1.8006862169  | -3.3481160946 | 0.9338238493  |
| H  | 1.0  | 1.7425063888  | -1.3978568261 | -1.8293139623 |
| H  | 1.0  | 2.5216342501  | -0.0004457081 | -1.0655400498 |
| H  | 1.0  | 3.0629049904  | -1.6410359614 | -0.6489038591 |
| H  | 1.0  | 2.2283112597  | 0.4759933544  | 1.8346087737  |
| H  | 1.0  | 1.4356131419  | -0.7542637024 | 2.8221176311  |
| H  | 1.0  | 2.9279450088  | -1.1633324887 | 1.9262966442  |
| H  | 1.0  | -2.7001405923 | 2.4926879130  | -1.0643379498 |
| H  | 1.0  | -2.1240260650 | 3.1275995054  | 0.4904196280  |
| H  | 1.0  | -1.5613808483 | 3.8595164703  | -1.0363233553 |
| H  | 1.0  | 0.6914948145  | 2.8746339256  | 1.2652332449  |
| H  | 1.0  | 1.8721340509  | 2.2131120976  | 0.1219516516  |
| H  | 1.0  | 1.0001473489  | 3.7077669013  | -0.2865381879 |
| H  | 1.0  | 0.9592007894  | 1.2013570484  | -2.5274976067 |
| H  | 1.0  | -0.7385283715 | 1.4053174027  | -2.9679841595 |
| H  | 1.0  | 0.2765034195  | 2.8445351913  | -2.6594783423 |

**Table S2b.** Cartesian coordinates of benzidine.

|   |     |               |               |               |
|---|-----|---------------|---------------|---------------|
| C | 6.0 | 0.0011849090  | 0.0023784350  | -0.0006938065 |
| C | 6.0 | 1.4741528805  | 0.0044592136  | 0.0033976418  |
| C | 6.0 | -0.7321358890 | 1.1979665858  | 0.0290275471  |
| C | 6.0 | -0.7184281119 | -1.1989975360 | -0.0368844252 |
| C | 6.0 | -2.1059100098 | -1.2103265120 | -0.0224026492 |

|   |     |               |               |               |
|---|-----|---------------|---------------|---------------|
| C | 6.0 | -2.1198071207 | 1.1970880721  | 0.0398169920  |
| C | 6.0 | -2.8302000560 | -0.0127487310 | 0.0311704988  |
| H | 1.0 | -0.1797862326 | -2.1434314191 | -0.0274963076 |
| H | 1.0 | -2.6388683311 | -2.1595171751 | -0.0186359131 |
| H | 1.0 | -0.2002896147 | 2.1466091573  | 0.0113160317  |
| H | 1.0 | -2.6649372802 | 2.1384382111  | 0.0311357569  |
| N | 7.0 | -4.2301855127 | -0.0153871503 | 0.0371727712  |
| C | 6.0 | 2.2027347482  | 0.9363291060  | 0.7582479122  |
| C | 6.0 | 2.1973409838  | -0.9307142336 | -0.7476014799 |
| C | 6.0 | 3.5851101390  | -0.9241781105 | -0.7626009562 |
| C | 6.0 | 3.5908224747  | 0.9462597843  | 0.7529251052  |
| C | 6.0 | 4.3048706201  | 0.0220393441  | -0.0237289109 |
| H | 1.0 | 1.6620063180  | -1.6433726875 | -1.3701895032 |
| H | 1.0 | 4.1219682401  | -1.6384627145 | -1.3844763066 |
| H | 1.0 | 1.6664433560  | 1.6421157653  | 1.3887819909  |
| H | 1.0 | 4.1341930832  | 1.6537438589  | 1.3751164259  |
| N | 7.0 | 5.7110213668  | 0.0327783365  | -0.0271552395 |
| H | 1.0 | 6.0897059206  | -0.6990835147 | -0.6222203337 |
| H | 1.0 | 6.0924094393  | 0.9290618197  | -0.3148985232 |
| H | 1.0 | -4.6171181943 | -0.9446524291 | 0.1403929213  |
| H | 1.0 | -4.6290981262 | 0.6028009802  | 0.7354403179  |

**Table S2c.** Cartesian coordinates of TS1.

|    |      |               |               |               |
|----|------|---------------|---------------|---------------|
| Ru | 44.0 | -0.4567132686 | -0.4437324768 | -0.5987908704 |
| C  | 6.0  | 1.4208068615  | -1.1991384390 | -0.6790738144 |
| P  | 15.0 | -0.1809409742 | 1.7729218023  | -0.1098933008 |
| P  | 15.0 | -1.2993787092 | -1.0576738797 | 1.3385208600  |
| N  | 7.0  | -0.0247798731 | -2.3604635372 | -1.2601957087 |
| H  | 1.0  | 0.1453726366  | -2.5795005972 | -2.2389289359 |
| H  | 1.0  | 0.1307397488  | -3.1916364754 | -0.7026564327 |
| C  | 6.0  | 2.0712685516  | -0.6760119414 | -1.8309660247 |
| C  | 6.0  | 2.2654841596  | -1.6623541526 | 0.3589549757  |
| C  | 6.0  | 3.6446438263  | -1.5411215605 | 0.2736484061  |
| C  | 6.0  | 3.4527808145  | -0.5358198981 | -1.8912917447 |
| C  | 6.0  | 4.2829646897  | -0.9649681118 | -0.8420779586 |
| H  | 1.0  | 1.8283340019  | -2.0799823462 | 1.2641138501  |
| H  | 1.0  | 4.2503373905  | -1.8601488270 | 1.1203934878  |
| H  | 1.0  | 1.4765390554  | -0.3908075417 | -2.7027614917 |



|   |     |               |               |               |
|---|-----|---------------|---------------|---------------|
| H | 1.0 | 3.9018993547  | -0.1297059654 | -2.7959882470 |
| C | 6.0 | 5.7501083596  | -0.8277120950 | -0.9081699697 |
| C | 6.0 | 6.6089836213  | -1.7802759656 | -0.3351904080 |
| C | 6.0 | 6.3602384286  | 0.2660363234  | -1.5445835818 |
| C | 6.0 | 7.7409218361  | 0.4017919426  | -1.6117079741 |
| C | 6.0 | 7.9910291307  | -1.6508280195 | -0.3889940358 |
| C | 6.0 | 8.5855816313  | -0.5557572557 | -1.0319240817 |
| H | 1.0 | 5.7367430355  | 1.0442345408  | -1.9785336439 |
| H | 1.0 | 8.1743447475  | 1.2719003382  | -2.1021811918 |
| H | 1.0 | 6.1846013877  | -2.6613316575 | 0.1403031837  |
| H | 1.0 | 8.6219647017  | -2.4135615745 | 0.0646087709  |
| N | 7.0 | 9.9736319578  | -0.3916764356 | -1.0415961167 |
| H | 1.0 | 10.3227669357 | 0.1585028573  | -1.8158804190 |
| H | 1.0 | 10.4950009626 | -1.2539621884 | -0.9487307215 |
| C | 6.0 | -3.1110834082 | -0.7203114179 | 1.5359628249  |
| C | 6.0 | -1.2601837546 | -2.8665939871 | 1.7277007325  |
| C | 6.0 | -0.6342585550 | -0.3683345693 | 2.9193433497  |
| H | 1.0 | 0.4426998237  | -0.5545333452 | 2.9714099704  |
| H | 1.0 | -0.7960818196 | 0.7130888359  | 2.9555692087  |
| H | 1.0 | -1.1216460553 | -0.8247172779 | 3.7892201820  |
| H | 1.0 | -1.7622241550 | -3.4184905229 | 0.9281279977  |
| H | 1.0 | -0.2253473451 | -3.2166891154 | 1.7919219871  |
| H | 1.0 | -1.7597452427 | -3.0756511639 | 2.6807970603  |
| H | 1.0 | -3.2990952295 | 0.3537667932  | 1.4490006063  |
| H | 1.0 | -3.6587509883 | -1.2270665691 | 0.7354546717  |
| H | 1.0 | -3.4858907613 | -1.0729240518 | 2.5048002059  |
| C | 6.0 | -1.4701225581 | 2.8880410248  | 0.6317607950  |
| C | 6.0 | 1.2860714431  | 2.2170739440  | 0.9252629397  |
| C | 6.0 | 0.2037803163  | 2.7313544310  | -1.6519174600 |
| H | 1.0 | -2.3699397554 | 2.8714305380  | 0.0078015661  |
| H | 1.0 | -1.7466300405 | 2.5329612007  | 1.6302626955  |
| H | 1.0 | -1.1180439698 | 3.9228094108  | 0.7178427779  |
| H | 1.0 | 1.0718600968  | 2.2831741128  | -2.1452422702 |
| H | 1.0 | -0.6466018983 | 2.6904630583  | -2.3406629109 |
| H | 1.0 | 0.4280404470  | 3.7810451161  | -1.4283621283 |
| H | 1.0 | 1.1484791864  | 1.8541717233  | 1.9478907602  |
| H | 1.0 | 2.1631657299  | 1.7123843471  | 0.5090876769  |
| H | 1.0 | 1.4597494914  | 3.2996796222  | 0.9525009001  |

**Table S2d.** Cartesian coordinates of TS2.

|    |      |               |               |               |
|----|------|---------------|---------------|---------------|
| Ru | 44.0 | -0.8663063172 | -0.1539933360 | 0.3098345025  |
| P  | 15.0 | 1.2997693421  | -0.6192877362 | 0.7996732340  |
| P  | 15.0 | -0.4853506296 | 1.8288861476  | -0.5805278803 |
| N  | 7.0  | -2.9725558081 | -0.0062377544 | 0.5543905036  |
| H  | 1.0  | -2.0199437392 | 0.4777203237  | 1.3885361245  |
| C  | 6.0  | 1.5732934650  | -2.3969503165 | 1.2690110219  |
| C  | 6.0  | 2.6820927944  | -0.4281447884 | -0.4301893295 |
| C  | 6.0  | 2.0718460355  | 0.2046189300  | 2.2710452899  |
| C  | 6.0  | -1.9724626792 | 2.9301953235  | -0.7122255466 |
| C  | 6.0  | 0.7194157238  | 3.0407854084  | 0.1360445792  |
| C  | 6.0  | 0.0604402825  | 1.8317484107  | -2.3556705328 |
| H  | 1.0  | 0.9486820656  | -2.6484529856 | 2.1326471197  |
| H  | 1.0  | 1.2798062439  | -3.0465983953 | 0.4381791235  |
| H  | 1.0  | 2.6207704144  | -2.5966078525 | 1.5252880711  |
| H  | 1.0  | 2.4474396821  | -1.0033329779 | -1.3318903306 |
| H  | 1.0  | 2.7863152142  | 0.6226910908  | -0.7203905333 |
| H  | 1.0  | 3.6420551112  | -0.7728679566 | -0.0275719816 |
| H  | 1.0  | 2.0935744609  | 1.2881726204  | 2.1254256911  |
| H  | 1.0  | 1.4540201872  | 0.0022292351  | 3.1513538306  |
| H  | 1.0  | 3.0926750610  | -0.1531960998 | 2.4555502899  |
| H  | 1.0  | -2.7490924064 | 2.4247418782  | -1.2956338863 |
| H  | 1.0  | -2.3682376398 | 3.1356759542  | 0.2876418303  |
| H  | 1.0  | -1.7319963958 | 3.8818815615  | -1.2005606901 |
| H  | 1.0  | 0.4390867891  | 3.2595532184  | 1.1708049472  |
| H  | 1.0  | 1.7278269369  | 2.6161341007  | 0.1393802979  |
| H  | 1.0  | 0.7369513912  | 3.9756666533  | -0.4371431672 |
| H  | 1.0  | 1.0274283345  | 1.3286321176  | -2.4486884215 |
| H  | 1.0  | -0.6655576230 | 1.2721078717  | -2.9539091777 |
| H  | 1.0  | 0.1476265785  | 2.8487461344  | -2.7583723805 |
| H  | 1.0  | -3.6647208695 | 0.6426716146  | 0.2037639123  |
| C  | 6.0  | -3.2961740562 | -1.3379574602 | 0.6363507443  |
| C  | 6.0  | -4.4674437005 | -1.9373092555 | 0.1367123225  |
| C  | 6.0  | -2.3056997182 | -2.1767879337 | 1.2001224809  |
| C  | 6.0  | -2.4552714521 | -3.5603809337 | 1.1977171512  |
| C  | 6.0  | -4.6103760171 | -3.3157915062 | 0.1709717081  |
| C  | 6.0  | -3.6106745351 | -4.1652935136 | 0.6857145744  |

|   |     |               |                |               |
|---|-----|---------------|----------------|---------------|
| H | 1.0 | -1.4700567683 | -1.7085335479  | 1.7538868809  |
| H | 1.0 | -1.6621368136 | -4.1819555980  | 1.6061840360  |
| H | 1.0 | -5.2528589073 | -1.3156591938  | -0.2880702373 |
| H | 1.0 | -5.5350670960 | -3.7550814178  | -0.1965868908 |
| C | 6.0 | -3.7871169220 | -5.6328672692  | 0.7029534927  |
| C | 6.0 | -3.3290637346 | -6.4171388498  | 1.7728250292  |
| C | 6.0 | -4.4192547093 | -6.3071317343  | -0.3531638792 |
| C | 6.0 | -4.5859681482 | -7.6858813307  | -0.3461827888 |
| C | 6.0 | -3.4859108157 | -7.7970270741  | 1.7888479746  |
| C | 6.0 | -4.1198798057 | -8.4594445941  | 0.7271690421  |
| H | 1.0 | -4.7637786088 | -5.7416235985  | -1.2157501822 |
| H | 1.0 | -5.0770850593 | -8.1743149848  | -1.1859235699 |
| H | 1.0 | -2.8598431520 | -5.9329110992  | 2.6260517503  |
| H | 1.0 | -3.1313169988 | -8.3706947316  | 2.6433135392  |
| N | 7.0 | -4.3343658796 | -9.8369621476  | 0.7665491003  |
| H | 1.0 | -4.4553142842 | -10.2720944550 | -0.1384962164 |
| H | 1.0 | -3.6756948233 | -10.3518931662 | 1.3358254264  |

**Table S2e.** Cartesian coordinates of  $(\text{PMe}_3)_2\text{Ru}(\text{NH}_2)(\text{C}_6\text{H}_4\text{-C}_6\text{H}_4\text{-NH}_2)$ .

|    |      |               |               |               |
|----|------|---------------|---------------|---------------|
| Ru | 44.0 | -0.4625363160 | -0.3414711993 | -0.6259791051 |
| C  | 6.0  | 1.5388702135  | -0.4096813449 | -0.4120645545 |
| P  | 15.0 | -0.2887290874 | 1.8901470204  | -0.0302119918 |
| P  | 15.0 | -1.0785124198 | -1.2155159543 | 1.2929609582  |
| N  | 7.0  | -1.3537245658 | -1.8091601176 | -1.6153917836 |
| H  | 1.0  | -1.0781550968 | -1.9178408108 | -2.5930127702 |
| H  | 1.0  | -1.6521584696 | -2.7282151271 | -1.2968253553 |
| C  | 6.0  | 2.1809864144  | -0.3140974404 | -1.6693903740 |
| C  | 6.0  | 2.3935591120  | -0.6193613472 | 0.6858451242  |
| C  | 6.0  | 3.7748030697  | -0.7447378303 | 0.5405881042  |
| C  | 6.0  | 3.5579074596  | -0.4380100444 | -1.8206314660 |
| C  | 6.0  | 4.3949419086  | -0.6587927495 | -0.7138634094 |
| H  | 1.0  | 1.9823084227  | -0.6711339799 | 1.6923157518  |
| H  | 1.0  | 4.3904702299  | -0.8812679692 | 1.4283000391  |
| H  | 1.0  | 1.5837892156  | -0.1612700057 | -2.5739285506 |
| H  | 1.0  | 3.9912541292  | -0.3931681382 | -2.8182692052 |
| C  | 6.0  | 5.8591715305  | -0.7881789645 | -0.8652319776 |
| C  | 6.0  | 6.6050874801  | -1.6727688149 | -0.0705565176 |
| C  | 6.0  | 6.5711797007  | -0.0333813763 | -1.8106611728 |

|   |     |               |               |               |
|---|-----|---------------|---------------|---------------|
| C | 6.0 | 7.9470202590  | -0.1530783897 | -1.9590963797 |
| C | 6.0 | 7.9817246087  | -1.7980339838 | -0.2066566536 |
| C | 6.0 | 8.6806374960  | -1.0394311596 | -1.1569194294 |
| H | 1.0 | 6.0371180362  | 0.6825163013  | -2.4311177767 |
| H | 1.0 | 8.4662446680  | 0.4603334680  | -2.6936204172 |
| H | 1.0 | 6.0901715022  | -2.2996796780 | 0.6536130450  |
| H | 1.0 | 8.5249145060  | -2.4989901838 | 0.4251002408  |
| N | 7.0 | 10.0707938558 | -1.1195553089 | -1.2605817255 |
| H | 1.0 | 10.4387219565 | -0.8667951921 | -2.1686000340 |
| H | 1.0 | 10.4650653078 | -1.9944507816 | -0.9398844259 |
| C | 6.0 | -2.8926498439 | -1.5327395581 | 1.4335041199  |
| C | 6.0 | -0.3696064744 | -2.8884864407 | 1.6077478052  |
| C | 6.0 | -0.7484645137 | -0.3650331868 | 2.8977248863  |
| H | 1.0 | 0.3231954976  | -0.1890620282 | 3.0230345750  |
| H | 1.0 | -1.2626612420 | 0.6002750849  | 2.9189234568  |
| H | 1.0 | -1.1075142766 | -0.9722352124 | 3.7369664648  |
| H | 1.0 | -0.6725259334 | -3.5618004245 | 0.8006599591  |
| H | 1.0 | 0.7221881134  | -2.8240354626 | 1.5936277288  |
| H | 1.0 | -0.7034516304 | -3.2997687699 | 2.5678077798  |
| H | 1.0 | -3.4282447970 | -0.5784141679 | 1.4480943094  |
| H | 1.0 | -3.2253250441 | -2.0853283784 | 0.5504039846  |
| H | 1.0 | -3.1398020640 | -2.0986464092 | 2.3396190678  |
| C | 6.0 | -1.8571781244 | 2.7585294145  | 0.4341145085  |
| C | 6.0 | 0.8732236351  | 2.5865014280  | 1.2304308470  |
| C | 6.0 | 0.2197216967  | 2.8615387863  | -1.5221580201 |
| H | 1.0 | -2.6189991406 | 2.5534596286  | -0.3244877985 |
| H | 1.0 | -2.2269563937 | 2.3787719728  | 1.3926882803  |
| H | 1.0 | -1.7153908068 | 3.8427244816  | 0.5187709006  |
| H | 1.0 | 1.2207327340  | 2.5418813903  | -1.8303099815 |
| H | 1.0 | -0.4753297138 | 2.6677424663  | -2.3463424157 |
| H | 1.0 | 0.2343486581  | 3.9388775966  | -1.3200179596 |
| H | 1.0 | 0.5858159070  | 2.2537531109  | 2.2327089051  |
| H | 1.0 | 1.8821045281  | 2.2159110827  | 1.0281850201  |
| H | 1.0 | 0.8757786340  | 3.6823064343  | 1.2124717462  |

**Table S2f.** Cartesian coordinates of  $(\text{PMe}_3)_2\text{Ru}(\text{H})(\text{NH}-\text{C}_6\text{H}_4-\text{C}_6\text{H}_4-\text{NH}_2)$ .

|    |      |               |               |              |
|----|------|---------------|---------------|--------------|
| Ru | 44.0 | -1.1529120362 | 0.0071916493  | 0.5551172995 |
| P  | 15.0 | 0.8558752276  | -1.0342744408 | 0.6240706203 |

|   |      |               |               |               |
|---|------|---------------|---------------|---------------|
| P | 15.0 | -0.5329920918 | 1.9648769860  | -0.3057510336 |
| N | 7.0  | -3.1233834292 | 0.1841010872  | -0.0679281929 |
| H | 1.0  | -0.6128448281 | 0.5330794524  | 1.9546803092  |
| C | 6.0  | 0.7508705291  | -2.8118989771 | 1.1243116801  |
| C | 6.0  | 1.7293330536  | -1.1933022196 | -1.0016950767 |
| C | 6.0  | 2.2493109517  | -0.4806735185 | 1.7108617335  |
| C | 6.0  | -1.6537114446 | 3.3374211435  | 0.2126753021  |
| C | 6.0  | 1.1159492971  | 2.7071587851  | 0.0702994246  |
| C | 6.0  | -0.5772074304 | 2.1384932038  | -2.1494148132 |
| H | 1.0  | 0.4268685611  | -2.8738474459 | 2.1677547788  |
| H | 1.0  | 0.0033510688  | -3.3245617103 | 0.5119949913  |
| H | 1.0  | 1.7179028560  | -3.3182961607 | 1.0195973026  |
| H | 1.0  | 1.0565306064  | -1.6703087791 | -1.7213514360 |
| H | 1.0  | 1.9849430425  | -0.2005325293 | -1.3858726135 |
| H | 1.0  | 2.6468109136  | -1.7884870226 | -0.9200969399 |
| H | 1.0  | 2.5408079163  | 0.5434788946  | 1.4609140567  |
| H | 1.0  | 1.9074863621  | -0.4869642830 | 2.7504471635  |
| H | 1.0  | 3.1251899278  | -1.1333234029 | 1.6153532945  |
| H | 1.0  | -2.6882204170 | 3.0519696555  | 0.0021183615  |
| H | 1.0  | -1.5646790336 | 3.4766617029  | 1.2942434731  |
| H | 1.0  | -1.4171811169 | 4.2795488543  | -0.2964339655 |
| H | 1.0  | 1.2383299868  | 2.7744303585  | 1.1553800254  |
| H | 1.0  | 1.9156389959  | 2.0747361917  | -0.3276963163 |
| H | 1.0  | 1.2120180558  | 3.7088321928  | -0.3645298669 |
| H | 1.0  | 0.1394166335  | 1.4457287307  | -2.6015922464 |
| H | 1.0  | -1.5745101428 | 1.8719308438  | -2.5135521472 |
| H | 1.0  | -0.3417365684 | 3.1599392669  | -2.4724573348 |
| H | 1.0  | -3.4658678236 | 0.5742436567  | -0.9426254742 |
| C | 6.0  | -3.3236284208 | -1.1611372946 | 0.0495793379  |
| C | 6.0  | -3.8474801695 | -2.0335914555 | -0.9453693179 |
| C | 6.0  | -2.8716667452 | -1.7565892773 | 1.2653983182  |
| C | 6.0  | -2.8998022661 | -3.1461938843 | 1.4362232998  |
| C | 6.0  | -3.8986680506 | -3.3939488168 | -0.7316813606 |
| C | 6.0  | -3.4113755661 | -3.9961059023 | 0.4556232185  |
| H | 1.0  | -2.6473324334 | -1.1017105719 | 2.1117565303  |
| H | 1.0  | -2.5285015162 | -3.5667914858 | 2.3682313676  |
| H | 1.0  | -4.2215468625 | -1.6106309006 | -1.8761282661 |
| H | 1.0  | -4.3434495931 | -4.0291367684 | -1.4950266583 |

|   |     |               |                |               |
|---|-----|---------------|----------------|---------------|
| C | 6.0 | -3.4763808270 | -5.4600395949  | 0.6480458181  |
| C | 6.0 | -3.7567454620 | -6.0264178292  | 1.9016319576  |
| C | 6.0 | -3.2607334366 | -6.3509207793  | -0.4151711312 |
| C | 6.0 | -3.3186492555 | -7.7277919688  | -0.2413972837 |
| C | 6.0 | -3.8125693070 | -7.4013437994  | 2.0885581929  |
| C | 6.0 | -3.5953712117 | -8.2808660742  | 1.0175288122  |
| H | 1.0 | -3.0154014714 | -5.9577874519  | -1.3991573125 |
| H | 1.0 | -3.1417831804 | -8.3866957190  | -1.0897538086 |
| H | 1.0 | -3.9614459476 | -5.3735958698  | 2.7468062576  |
| H | 1.0 | -4.0485429052 | -7.8029932681  | 3.0724887112  |
| N | 7.0 | -3.7132246172 | -9.6605795432  | 1.1865505841  |
| H | 1.0 | -3.2111071045 | -10.2139870078 | 0.5046511942  |
| H | 1.0 | -3.5353476387 | -9.9882146882  | 2.1269859470  |
